# Supplementary material for: Genome-Wide Analysis Reveals Genetic Potential for Aromatic Compounds Biodegradation of Sphingopyxis
Source: Biomed Res Int. 2020 May 27;2020:5849123. doi: 10.1155/2020/5849123 (PMC7273453; doi:10.1155/2020/5849123)
Supplement: Supplementary 2 — Table S1: Genome-based phylogenetic indicators of Sphingopyxis strains. Table S2: Identification of gene clusters potentially involved in aromatic compounds degradation in Sphingopyxis strains. Table S3 Distribution of predicted IS elements in Sphingopyxis strains. [file 5849123.f2.xlsx]

## Sheet: Table S1
Table S1 Genome-based phylogenetic indicators of Sphingopyxis strains.
ANIb value	S.alaskensis RB2256	S.baekryungensis DSM 16222	S.bauzanensis DSM 22271	S.flava R11H	S.fribergensis Kp52	S.granuli NBRC 100800	S.indica DS15	S.macrogoltabida 203N	Sphingopyxis sp. 113P3	Sphingopyxis sp. C-1	Sphingopyxis sp. EG6	Sphingopyxis sp. FD7	Sphingopyxis sp. MC1	Sphingopyxis sp. MG	Sphingopyxis sp. MWB1	Sphingopyxis sp. YF1	S.terrae NBRC 15098	S.ummariensis UI2	S.witflariensis DSM 14551
S.alaskensis RB2256	*	70.33	81.5	79.57	82.68	81.19	81.64	81.97	79.62	82.43	82.84	88.74	81.61	81.17	78.9	81.8	81.03	81.01	80.94
S.baekryungensis DSM 16222	70.08	*	69.48	69.2	69.61	70.31	70.95	69.97	69.14	69.42	69.84	70.2	70.09	70.31	69.87	70.05	70.02	70.06	69.74
S.bauzanensis DSM 22271	81.02	69.54	*	77.47	82.43	79.26	79.1	80.89	77.55	81.3	85.01	80.93	79.35	79.28	77.32	80.03	79.2	79.06	80.89
S.flava R11H	79.11	69.13	77.5	*	78.29	80.31	80.43	79.02	90.98	78.19	78.34	79.01	78.92	80.25	76.81	79.18	78.67	78.86	78.23
S.fribergensis Kp52	81.68	69.31	81.71	77.88	*	79.33	79.51	82.19	78.18	84.31	82.85	81.89	79.75	79.23	76.87	80.22	80.24	79.24	80.52
S.granuli NBRC 100800	80.86	70.45	79.38	80.01	79.74	*	81.61	80.96	79.9	79.87	80.05	80.93	81.18	96.79	78.25	81.09	80.69	81.16	79.87
S.indica DS15	80.95	70.93	79.12	80.24	79.89	81.72	*	80.45	80.52	79.71	79.76	80.47	80.79	81.51	78.43	80.7	80.52	80.95	79.57
S.macrogoltabida 203N	80.52	69.63	79.77	78.27	82.15	79.78	79.63	*	78.11	81.74	81.48	81.14	80.27	80.06	77.35	80.72	81.34	79.78	80.39
Sphingopyxis sp. 113P3	78.76	68.94	77.2	90.1	78.09	79.41	80.36	78.71	*	77.76	78.14	78.81	78.69	79.27	76.2	78.57	78.36	78.18	77.73
Sphingopyxis sp. C-1	81.64	69.2	81.02	77.95	84.83	79.76	79.38	82.32	77.85	*	81.58	81.66	79.5	79.51	76.95	81	79.12	79.32	80.36
Sphingopyxis sp. EG6	82.45	69.71	85.11	78.35	83.57	80.15	80.05	82.42	78.78	82.11	*	82.22	80.54	80.03	77.92	81.03	81.59	80.12	81.44
Sphingopyxis sp. FD7	88.21	70.55	80.98	79.07	82.49	81.05	80.7	81.8	79.21	82.26	82.07	*	81.18	80.85	78.69	81.25	81.21	80.84	80.48
Sphingopyxis sp. MC1	81.34	69.85	79.57	79.03	80.53	81.65	81.28	81.08	79.23	80.05	80.59	81.23	*	81.56	78.07	80.75	95.64	96.3	79.9
Sphingopyxis sp. MG	80.7	70.48	79.45	80.09	79.77	96.87	81.79	80.82	79.78	79.91	80.02	80.81	81.15	*	78.28	81.13	81	81.32	80.11
Sphingopyxis sp. MWB1	78.62	69.94	77.61	76.8	77.63	78.23	78.59	78.08	76.8	77.26	78.07	78.82	78.17	78.29		78.04	78.06	78.22	78.04
Sphingopyxis sp. YF-1	81.49	70.14	80.31	79.25	80.95	81.18	80.91	81.73	79.45	81.37	81.19	81.4	80.61	81.25	78.08	*	80.51	80.54	80.78
S.terrae NBRC 15098	80.61	69.96	79.39	78.54	81.1	80.97	80.74	81.84	78.72	79.51	81.58	81.06	95.23	81.09	77.92	80.31	*	94.71	79.54
S.ummariensis UI2	80.76	70.09	79.47	78.98	80.09	81.69	81.14	80.76	78.87	79.99	80.24	80.91	96.49	81.61	78.26	80.67	95.09	*	79.76
S.witflariensis DSM 14551	80.27	69.66	80.86	78.02	80.84	79.8	79.51	80.67	77.77	80.37	81.21	80.18	79.65	79.7	77.43	80.47	79.29	79.41	*
ANIm value	S.alaskensis RB2256	S.baekryungensis DSM 16222	S.bauzanensis DSM 22271	S.flava R11H	S.fribergensis Kp52	S.granuli NBRC 100800	S.indica DS15	S.macrogoltabida 203N	Sphingopyxis sp. 113P3	Sphingopyxis sp. C-1	Sphingopyxis sp. EG6	Sphingopyxis sp. FD7	Sphingopyxis sp. MC1	Sphingopyxis sp. MG	Sphingopyxis sp. MWB1	Sphingopyxis sp. YF1	S.terrae NBRC 15098	S.ummariensis UI2	S.witflariensis DSM 14551
ANIb	S.alaskensis RB2256	S.baekryungensis DSM 16222	S.bauzanensis DSM 22271	S.flava R11H	S.fribergensis Kp52	S.granuli NBRC 100800	S.indica DS15	S.macrogoltabida 203N	Sphingopyxis sp. 113P3	Sphingopyxis sp. C-1	Sphingopyxis sp. EG6	Sphingopyxis sp. FD7	Sphingopyxis sp. MC1	Sphingopyxis sp. MG	Sphingopyxis sp. MWB1	Sphingopyxis sp. YF1	S.terrae NBRC 15098	S.ummariensis UI2	S.witflariensis DSM 14551
S.alaskensis RB2256	*	82.6	85.19	84.4	85.83	85.34	85.74	85.81	84.54	85.43	86.15	89.91	85.86	85.28	84.51	85.82	85.42	85.19	85.16
S.baekryungensis DSM 16222	82.6	*	82.77	83.19	82.88	82.56	85.19	82.96	83.3	82.88	82.73	82.94	82.87	82.7	82.71	82.84	82.87	83.01	82.82
S.bauzanensis DSM 22271	85.18	82.77	*	83.79	86	84.32	84.56	85.44	83.89	85.12	87.42	85.18	84.6	84.34	84.04	85.09	84.7	84.47	85.25
S.flava R11H	84.4	83.14	83.78	*	84.05	85.16	84.76	84.46	92.17	84	84.17	84.52	84.32	85.08	84.02	84.63	84.31	84.27	83.89
S.fribergensis Kp52	85.83	82.88	86	84.05	*	84.89	85.36	86.81	84.54	87.1	86.75	86.2	85.22	84.75	84.22	85.57	86.08	84.71	85.62
S.granuli NBRC 100800	85.34	82.56	84.32	85.17	84.89	*	86.17	85.62	85.2	84.8	84.82	85.54	85.68	98.05	84.51	85.71	85.52	85.6	84.63
S.indica DS15	85.76	85.23	84.56	84.77	85.36	86.16	*	85.52	85.2	84.74	85.21	85.71	85.62	86.08	84.84	85.61	85.51	85.63	84.75
S.macrogoltabida 203N	85.81	82.95	85.43	84.46	86.81	85.62	85.53	*	84.65	86.28	86.36	86.21	85.63	85.5	84.3	86.03	86.48	85.34	85.34
Sphingopyxis sp. 113P3	84.54	83.3	83.88	92.17	84.54	85.19	85.18	84.65	*	84.04	84.82	84.93	84.65	85.04	84	84.52	84.65	84.31	83.88
Sphingopyxis sp. C-1	85.44	82.88	85.12	84.02	87.1	84.81	84.74	86.29	84.03	*	85.57	85.52	84.97	84.69	84.02	86	84.77	84.83	85.09
Sphingopyxis sp. EG6	86.15	82.73	87.43	84.17	86.75	84.82	85.21	86.36	84.82	85.57	*	86.09	85.45	84.87	84.42	85.62	86.52	84.95	85.87
Sphingopyxis sp. FD7	89.91	82.94	85.18	84.53	86.21	85.54	85.72	86.21	84.93	85.52	86.09	*	85.61	85.47	84.64	85.8	85.72	85.33	85
Sphingopyxis sp. MC1	85.86	82.87	84.6	84.32	85.22	85.69	85.62	85.63	84.66	84.98	85.45	85.6	*	85.62	84.56	85.48	96.37	97.26	84.87
Sphingopyxis sp. MG	85.28	82.7	84.34	85.1	84.75	98.04	86.09	85.51	85.04	84.69	84.86	85.46	85.61	*	84.47	85.66	85.58	85.65	84.66
Sphingopyxis sp. MWB1	84.5	82.71	84.03	84.01	84.23	84.51	84.84	84.3	83.99	84.01	84.42	84.64	84.58	84.47	*	84.39	84.47	84.46	84.18
Sphingopyxis sp. YF-1	85.83	82.84	85.09	84.63	85.57	85.7	85.61	86.03	84.53	86.01	85.62	85.81	85.49	85.66	84.39	*	85.35	85.41	85.35
S.terrae NBRC 15098	85.41	82.87	84.7	84.32	86.08	85.52	85.51	86.44	84.66	84.78	86.52	85.72	96.37	85.58	84.47	85.35	*	95.97	84.72
S.ummariensis UI2	85.19	83.01	84.47	84.27	84.7	85.59	85.64	85.34	84.32	84.84	84.96	85.33	97.26	85.65	84.45	85.41	95.97	*	84.71
S.witflariensis DSM 14551	85.15	82.82	85.24	83.89	85.63	84.62	84.75	85.33	83.93	85.06	85.88	85	84.88	84.66	84.15	85.34	84.73	84.71	*
TETER value	S.alaskensis RB2256	S.baekryungensis DSM 16222	S.bauzanensis DSM 22271	S.flava R11H	S.fribergensis Kp52	S.granuli NBRC 100800	S.indica DS15	S.macrogoltabida 203N	Sphingopyxis sp. 113P3	Sphingopyxis sp. C-1	Sphingopyxis sp. EG6	Sphingopyxis sp. FD7	Sphingopyxis sp. MC1	Sphingopyxis sp. MG	Sphingopyxis sp. MWB1	Sphingopyxis sp. YF1	S.terrae NBRC 15098	S.ummariensis UI2	S.witflariensis DSM 14551
S.alaskensis RB2256	*	0.78058	0.97121	0.95162	0.97952	0.97031	0.97642	0.97307	0.94962	0.9788	0.97437	0.99674	0.98404	0.97263	0.94651	0.96935	0.98204	0.98307	0.97367
S.baekryungensis DSM 16222	0.78058	*	0.78401	0.83641	0.79508	0.7706	0.75278	0.79199	0.84253	0.7892	0.77834	0.77865	0.80228	0.77042	0.81584	0.75477	0.80891	0.80369	0.79409
S.bauzanensis DSM 22271	0.97121	0.78401	*	0.95897	0.98578	0.95469	0.95707	0.97718	0.9556	0.97666	0.9944	0.97257	0.97735	0.95707	0.94717	0.96532	0.97961	0.9762	0.9834
S.flava R11H	0.95162	0.83641	0.95897	*	0.96951	0.94809	0.95347	0.96745	0.99798	0.96465	0.9438	0.95606	0.96477	0.94759	0.92084	0.94724	0.97155	0.96443	0.95744
S.fribergensis Kp52	0.97952	0.79508	0.98578	0.96951	*	0.97423	0.97999	0.99226	0.96782	0.99411	0.98465	0.98153	0.98933	0.97562	0.93526	0.98195	0.99184	0.98841	0.98869
S.granuli NBRC 100800	0.97031	0.7706	0.95469	0.94809	0.97423	*	0.9791	0.98036	0.94498	0.96148	0.9608	0.97433	0.97355	0.99927	0.90705	0.98329	0.97259	0.97233	0.96395
S.indica DS15	0.97642	0.75278	0.95707	0.95347	0.97999	0.9791	*	0.97965	0.94979	0.97284	0.96191	0.98016	0.98487	0.98161	0.90602	0.98194	0.98403	0.98474	0.96871
S.macrogoltabida 203N	0.97307	0.79199	0.97718	0.96745	0.99226	0.98036	0.97965	*	0.96697	0.98459	0.97592	0.97496	0.9858	0.98169	0.91796	0.98368	0.98843	0.98519	0.98302
Sphingopyxis sp. 113P3	0.94962	0.84253	0.9556	0.99798	0.96782	0.94498	0.94979	0.96697	*	0.96284	0.93976	0.95429	0.96086	0.94474	0.91674	0.94581	0.96814	0.96066	0.9563
Sphingopyxis sp. C-1	0.9788	0.7892	0.97666	0.96465	0.99411	0.96148	0.97284	0.98459	0.96284	*	0.9752	0.97585	0.98537	0.96318	0.93616	0.97022	0.98717	0.98443	0.98428
Sphingopyxis sp. EG6	0.97437	0.77834	0.9944	0.9438	0.98465	0.9608	0.96191	0.97592	0.93976	0.9752	*	0.97516	0.98003	0.96363	0.9441	0.97364	0.97884	0.97881	0.981
Sphingopyxis sp. FD7	0.99674	0.77865	0.97257	0.95606	0.98153	0.97433	0.98016	0.97496	0.95429	0.97585	0.97516	*	0.98261	0.97622	0.9379	0.97381	0.98185	0.98149	0.9722
Sphingopyxis sp. MC1	0.98404	0.80228	0.97735	0.96477	0.98933	0.97355	0.98487	0.9858	0.96086	0.98537	0.98003	0.98261	*	0.97632	0.94021	0.97902	0.99866	0.99956	0.98394
Sphingopyxis sp. MG	0.97263	0.77042	0.95707	0.94759	0.97562	0.99927	0.98161	0.98169	0.94474	0.96318	0.96363	0.97622	0.97632	*	0.91168	0.98477	0.97491	0.97519	0.96695
Sphingopyxis sp. MWB1	0.94651	0.81584	0.94717	0.92084	0.93526	0.90705	0.90602	0.91796	0.91674	0.93616	0.9441	0.9379	0.94021	0.91168	*	0.89671	0.93946	0.93802	0.95316
Sphingopyxis sp. YF1	0.96935	0.75477	0.96532	0.94724	0.98195	0.98329	0.98194	0.98368	0.94581	0.97022	0.97364	0.97381	0.97902	0.98477	0.89671	*	0.97746	0.97925	0.96476
S.terrae NBRC 15098	0.98204	0.80891	0.97961	0.97155	0.99184	0.97259	0.98403	0.98843	0.96814	0.98717	0.97884	0.98185	0.99866	0.97491	0.93946	0.97746	*	0.99844	0.98585
S.ummariensis UI2	0.98307	0.80369	0.9762	0.96443	0.98841	0.97233	0.98474	0.98519	0.96066	0.98443	0.97881	0.98149	0.99956	0.97519	0.93802	0.97925	0.99844	*	0.98255
S.witflariensis DSM 14551	0.97367	0.79409	0.9834	0.95744	0.98869	0.96395	0.96871	0.98302	0.9563	0.98428	0.981	0.9722	0.98394	0.96695	0.95316	0.96476	0.98585	0.98255	*

## Sheet: Table S2
Table S2 Identification of gene clusters potentially involved in aromatic compounds degradation in Sphingopyxis strains.
	Sphingopyxis alaskensis RB2256	Sphingopyxis baekryungensis DSM 16222	Sphingopyxis bauzanensis DSM 22271	Sphingopyxis flava R11H	Sphingopyxis fribergensis Kp52	Sphingopyxis granuli NBRC 100800	Sphingopyxis indica DS15	Sphingopyxis macrogoltabida 203N	Sphingopyxis sp. 113P3	Sphingopyxis sp. C-1	Sphingopyxis sp. EG6	Sphingopyxis sp. FD7	Sphingopyxis sp. MC1	Sphingopyxis sp. MG	Sphingopyxis sp. MWB1	Sphingopyxis terrae subsp. terrae 203-1	Sphingopyxis terrae subsp. Ummariensis UI2	Sphingopyxis witflariensis DSM14551	Sphingopyxis sp. YF1
xylA			contig25: 18369_19409				contig15: 73029_74348; contig30: 141620_143056	contig1: 5272439_5273869							contig2: 1212330_1213757
xylM								contig2: 285653_286762
aryl-alcohol dehydrogenase(k00055)			contig25: 67345_68442		contig1: 225237_226355	contig30: 32615_33742		contig1: 3132557_3133666; contig2: 275266_276366		contig2: 617406_618518	contig1: 221660_222766	contig2: 232988_234115		contig1: 2307269_2307634; contig1: 529109_530236				contig1: 131094_132200; contig37: 56520_57638	contig1: 3548194_3549306
xylC	contig1: 2594978_2596498		contig25: 30747_32246					contig1: 5207563_5209086								contig1: 3964678_3964872
benA	contig1: 363365_364129		contig25: 41419_42699; contig25: 44187_45599	contig27: 247380_248162				contig2: 327893_329254	contig1: 3904410_3905708			contig1: 328067_328831
benB			contig25: 43696_44190					contig2: 327408_327896	contig1: 3941733_3942236
benC	contig1: 107766_108512												contig7: 23848_24594					contig32: 372237_372983
benD														contig1: 3821987_3822538
catA				contig69: 1525_2298	contig1: 2785992_2786873								contig2: 296687_297496	contig2: 32447_33337; contig1: 3387001_3387912
catB				contig24: 12535_14274; contig37: 135_1247; contig69: 5117_6283									contig2: 302722_303906	contig69: 5117_6283	contig5: 258908_260080
catC														contig69: 6280_6594
fadA	contig1: 108571_109836; contig1: 1029325_1030485; contig1: 1540387_1540581; contig1: 2273025_2274206	contig2: 110794_111972	contig11: 1073305_1074486; contig21: 202571_203731	contig24: 9971_11173; contig54: 22988_24169; contig24: 9971_11173; contig54: 22988_24169	contig1: 231666_232868; contig1: 554781_555047; contig1: 634451_635632; contig1: 2736403_2737557	contig2: 97668_98858; contig64: 6406_7587	contig26: 33425_34606	contig1: 228090_229271; contig1: 1380849_1382015; contig1: 2118722_2119072; contig1: 2600394_2600663	contig1: 458347_459528	contig1: 1254344_1255600; contig2: 361421_362602; contig2: 1332930_1334210	contig1: 443523_444704; contig1: 1739301_1740584; contig1: 2230224_2231387	contig1: 1832835_1833998; contig1: 2838008_2839189	contig1: 76748_77929; contig2: 311109_312311; contig2: 384499_385665; contig7: 24653_25918	contig1: 175543_176724; contig1: 346261_347451	contig2: 823710_824870; contig2: 2470772_2471953	contig1: 382505_383671; contig1: 698205_699386	contig7: 603315_604481; contig8: 1043174_1044355	contig32: 370913_372178; contig33: 234552_235733	contig1: 358812_359993; contig1: 953880_955037; contig1: 4064458_4065738
DHBD	contig1: 68081_69100				contig1: 4712402_4713406
catE				contig20: 5171_5734; contig48: 51657_52220; contig20: 5171_5734; contig48: 51657_52220		contig1: 76596_76955; contig88: 4702_5259	contig14: 84488_85048	contig1: 145087_145644		contig1: 3055243_3055800	contig1: 161611_161958; contig1: 2596449_2597006		contig24: 33051_33608	contig1: 2733935_2734492		contig1: 794533_795090	contig8: 935554_936111	contig35: 65401_65802
dmpB			contig25: 38305_39228							contig1: 814063_815025		contig1: 3579995_3580936			contig5: 105425_106546
cmtC			contig25: 38305_39228; contig25: 45902_46801		contig1: 216920_217831	contig3: 91059_91643; contig3: 92485_92979; contig88: 4702_5259		contig2: 319668_320564; contig1: 145087_145644; contig2: 333508_334395			contig1: 2596449_2597006	contig1: 3574190_3575065; contig1: 3579995_3580936						contig34: 24687_25604	contig1: 908571_909152
cmtD			contig21: 650536_650880; contig2: 314363_315028
dmpD			contig11: 59131_60003; contig25: 25292_26152; contig25: 39249_40100				contig31: 1765_2607	contig2: 321334_322164				contig1: 3575121_3575981
bphH			contig11: 61957_62748; contig25: 26282_27124; contig25: 32761_33531; contig25: 35530_36342				contig32: 419_1210											contig34: 28763_29539
bphI			contig11: 63770_64810; contig25: 33541_34572				contig32: 2206_3246
bphJ			contig11: 62853_63770; contig25: 34569_35507				contig32: 1289_2206
mphD	contig1: 3194476_3195258	contig4: 441146_441934	contig25: 35530_36342; contig27: 38162_38938	contig35: 81734_82522; contig46: 226077_226856; contig35: 81734_82522; contig46: 226077_226856	contig1: 217828_218604; contig1: 875678_876349; contig1: 4119276_4120061	contig7: 52501_53280	contig30: 117256_118044	contig1: 151178_151957; contig1: 4922403_4923188; contig2: 316996_317772; contig2: 371000_371458	contig1: 62213_62995; contig1: 3799410_3800198	contig1: 3048912_3049691; contig2: 180344_181144; contig2: 932134_932916	contig1: 2590105_2590890; contig1: 3215368_3216150	contig1: 1495504_1496289; contig1: 2728928_2729710; contig1: 3583731_3584516	contig24: 39142_39921	contig1: 859078_859857	contig2: 1499024_1499815; contig2: 2115059_2115844	contig1: 788202_788987; contig1: 2228544_2229341; contig1: 2347121_2347903	contig7: 518642_519424; contig8: 929229_930008	contig22: 74725_75516; contig22: 408054_408842	contig1: 4217189_4217989
mphE			contig25: 33541_34572; contig11: 63770_64810		contig1: 219545_220573	contig7: 50533_51570		contig1: 152900_153922; contig2: 315025_316053		contig1: 3046956_3047981	contig1: 2588145_2589182	contig1: 3585457_3586482	contig24: 40879_41901	contig1: 860788_861825		contig1: 786245_787267	contig8: 927264_928286	contig34: 30492_31535
mphF			contig25: 34569_35507; contig11: 62853_63770		contig1: 218607_219545	contig7: 51567_52496		contig1: 151962_152903; contig2: 316050_316991		contig1: 3047978_3048907	contig1: 2589179_2590108	contig1: 3584519_3585460	contig24: 39926_40882	contig1: 859862_860791		contig1: 787264_788205	contig8: 928283_929224	contig34: 29549_30490; contig22: 530592_530840
pchF			contig25: 53662_55221; contig25: 58429_59895				contig31: 360876_362147
pchc			contig25: 59928_60284
pchA
pobA				contig53: 35701_36930			contig1: 5347224_5348435	contig1: 4390228_4391460	contig2: 572905_574122				contig17: 55401_56633		contig2: 1828659_1829879	contig1: 1265740_1266960	contig7: 1199781_1201001		contig1: 4333577_4334797
pcaG				contig27: 176365_177168
pcaH			contig21: 181721_182536
pcaB	contig1: 1100283_1101599	contig2: 711354_712655	contig22: 448022_449338	contig72: 181331_182647	contig1: 2098655_2099971	contig37: 19850_21166	contig31: 741844_743160	contig1: 2254423_2255739	contig1: 2473620_2474936	contig1: 2214749_2216059	contig1: 1576254_1577570	contig1: 1687863_1689179	contig6: 34044_35357	contig1: 1645770_1647086	contig2: 414124_415440	contig1: 3315108_3316421	contig6: 283822_285135	contig11: 563942_565252	contig1: 1861008_1862318; contig1: 2107748_2108143
pcaC	contig1: 2274208_2274792	contig10: 34379_34957; contig6: 189348_190004	contig11: 1072719_1073303	contig28: 3084_3674; contig54: 22402_22986; contig79: 10171_10545; contig82: 11453_12001; contig98: 3666_4085	contig1: 268640_269113; contig1: 269110_269847; contig1: 270680_271087; contig1: 633865_634449	contig64: 7587_8183		contig1: 1833934_1834308	contig1: 457761_458345	contig2: 362619_363203; contig2: 1341048_1342379	contig1: 442939_443523	contig1: 2839189_2839773	contig1: 77931_78515	contig1: 174947_175543		contig1: 699388_699972	contig8: 1044357_1044941	contig33: 235733_236317; contig37: 16642_17046	contig1: 2107748_2108143; contig1: 358226_358810; contig1: 2759240_2759812; contig1: 4072578_4073909
PcaD				contig24: 9114_9971; contig72: 200181_200447		contig52: 21995_22783; contig88: 6757_7584		contig1: 147139_147966; contig1: 1845038_1845889	contig1: 821306_822073; contig1: 3520099_3520353					contig1: 665454_666320; contig1: 2684971_2685759		contig1: 792211_793038; contig1: 2251074_2251721	contig8: 933232_934059	contig36: 188526_189359; contig37: 87238_87510
pcaL				contig24: 9114_9971
PcaI					contig1: 2813759_2814430					contig1: 788314_789024				contig1: 3396987_3397676; contig2: 30579_31268
PcaJ					contig1: 2814441_2815079					contig1: 787679_788317				contig1: 3397691_3398332; contig2: 29910_30566
PcaF					contig1: 2815090_2816298									contig1: 3398369_3399580; contig2: 28683_29891
ligA			contig11: 67877_68422				contig1: 3712893_3713303					contig2: 91442_91843
ligB			contig11: 68484_69305				contig32: 5709_6527	contig1: 3711092_3712054	contig1: 824294_825109			contig2: 91845_92687
ligC				contig92: 80366_82090; contig92: 110050_110316								contig2: 92711_93673
ligI				contig82: 5286_6167				contig1: 3718301_3719191				contig2: 85708_86592
ligJ				contig82: 4249_5274				contig1: 3713300_3714325				contig2: 90420_91445
ligK				contig82: 1340_2014				contig1: 3716522_3717196				contig2: 87639_88310							contig1: 883036_883575
galD				contig82: 292_1347				contig1: 3717189_3718304				contig2: 86585_87646							contig1: 1298156_1298491
galB
MdlA	contig1: 749522_750658						contig15: 195832_196155
MdlB
MdlC			contig82: 12794_14722					contig2: 159486_160649											contig1: 1829537_1829953

## Sheet: Table S3
Table S3 Distribution of predicted IS elements in Sphingopyxis strains.
Sequences producing significant alignments	IS Family	Group	Origin	Score (bits)	E-value
Sphingopyxis alaskensis RB2256
ISSpal2	IS5		Sphingopyxis alaskensis	2605	0
ISSpal1	IS481		Sphingopyxis alaskensis	1986	0
ISSsp2	IS3	IS150	Sphingomonas sp.	1586	0
ISPko4	IS3	IS150	Paracoccus kondratievae	1219	0
ISRsp3	IS21		Rhizobium sp.	1203	0
ISEli1	IS3	IS407	Erythrobacter litoralis	918	0
ISDev1	IS21		Devosia sp.	482	2e-132
ISMex27	IS21		Methylobacterium extorquens	442	2e-120
ISNwi5	IS481		Nitrobacter winogradskyi	353	1e-93
ISAzs17	Tn3		Azospirillum sp.	347	7e-92
ISSpma3	IS3	IS407	Sphingopyxis macrogoltabida	309	2e-80
ISSfr1	IS110	IS1111	Sinorhizobium fredii	289	1e-74
ISSsp4	IS21		Sphingomonas sp.	238	5e-59
ISCc3	IS3	IS150	Caulobacter crescentus	234	7e-58
IS711	IS5	IS427	Brucella ovis	212	3e-51
ISAzs28	IS5	IS1031	Azospirillum sp.	210	1e-50
ISMex39	IS21		Methylobacterium extorquens	208	4e-50
ISMno9	IS1182		Methylobacterium nodulans	202	3e-48
ISMdi27	IS21		Methylobacterium dichloromethanicum	192	2e-45
ISRel11	IS5	IS427	Rhizobium etli	182	2e-42
ISEc61	IS5	IS1031	Escherichia coli	172	2e-39
ISVasp1	IS21		Variovorax sp.	163	2e-36
ISAzs10	IS5		Azospirillum sp.	161	9e-36
ISRel12	IS481		Rhizobium sp.	159	3e-35
ISGdi9	IS481		Gluconacetobacter diazotrophicus	159	3e-35
ISPa64	IS21		Pseudomonas aeruginosa	155	5e-34
ISMex37	IS3	IS150	Methylobacterium extorquens	151	8e-33
ISCc1	IS5	IS427	Caulobacter crescentus	145	5e-31
ISPa42	Tn3		Pseudomonas aeruginosa	141	8e-30
ISAlde2	IS21		Alicycliphilus denitrificans	139	3e-29
ISPpn1	IS21		Pandoraea pnomenusa	139	3e-29
ISVapa3	IS21		Variovorax paradoxus	139	3e-29
ISMex16	IS3	IS150	Methylobacterium extorquens	139	3e-29
ISCte8	IS21		Comamonas testosteroni	137	1e-28
ISNe2	IS481		Nitrosomonas europaea	135	5e-28
ISPst3	IS21		Pseudomonas stutzeri	129	3e-26
ISShsp2	IS1182		Sphingomonas sp.	127	1e-25
ISMdi8	IS481		Methylobacterium dichloromethanicum	127	1e-25
ISAlde1	IS21		Alicycliphilus denitrificans	125	5e-25
ISAisp7	IS21		Acidovorax sp.	119	3e-23
ISMch1	IS3	IS150	Methylobacterium chloromethanicum	117	1e-22
ISBdi7	IS21		Bradyrhizobium diazoefficiens	115	5e-22
ISPye57	IS3	IS407	Paracoccus yeei	113	2e-21
ISAlsp1	IS21		Alcaligenes sp.	113	2e-21
ISThsp10	IS21		Thiomonas sp.	109	3e-20
ISMtsp16	IS481		Methylobacterium sp.	107	1e-19
ISMch3	IS3	IS150	Methylobacterium chloromethanicum	107	1e-19
ISMsi1	IS21		Methylocella silvestris	105	4e-19
ISCsp3	IS21		Comamonas sp.	103	2e-18
ISOba1	IS3	IS407	Oceanicola batsensis	103	2e-18
ISPa36	IS21		Pseudomonas aeruginosa	101	7e-18
ISMno31	IS3	IS150	Methylobacterium nodulans	101	7e-18
ISPa63	IS21		Pseudomonas aeruginosa	99.6	3e-17
TnXo19	Tn3		Xanthomonas oryzae	99.6	3e-17
ISPkr1	IS21		Paracoccus koreensis	99.6	3e-17
ISVapa2	IS21		Variovorax paradoxus	97.6	1e-16
ISAav1	IS21		Acidovorax avenae	97.6	1e-16
ISThsp19	IS21		Thiomonas sp.	95.6	4e-16
ISCARN16	IS21		Metagenomic data	95.6	4e-16
ISPa94	IS1182		Pseudomonas aeruginosa	93.7	2e-15
ISMamg2	IS3	IS407	Magnetospirillum magneticum	93.7	2e-15
ISCfr1	IS1182		Citrobacter freundii	91.7	7e-15
IS511	IS3	IS407	Caulobacter crescentus	91.7	7e-15
ISGxy1	IS3	IS150	Gluconacetobacter xylinus	85.7	4e-13
ISMex28	IS5	IS5	Methylobacterium extorquens	85.7	4e-13
ISSme1	IS3	IS407	Sinorhizobium medicae	85.7	4e-13
ISRm6	IS3	IS407	Rhizobium meliloti	85.7	4e-13
IS1600	IS21		Ralstonia eutropha	85.7	4e-13
ISPsy20	IS21		Pseudomonas syringae	83.8	2e-12
ISXau1	IS3	IS407	Xanthobacter autotrophicus	83.8	2e-12
ISPa65	IS21		Pseudomonas aeruginosa	81.8	6e-12
ISPha2	IS5		Paracoccus halophilus	81.8	6e-12
ISAtu5	IS3	IS407	Agrobacterium tumefaciens	81.8	6e-12
ISPye34	IS3	IS407	Paracoccus yeei	79.8	3e-11
ISNha8	IS5		Nitrobacter hamburgensis	79.8	3e-11
ISNisp7	IS5		Nitrobacter sp.	79.8	3e-11
ISMra5	IS5	IS427	Methylobacterium radiotolerans	79.8	3e-11
ISRssp12	IS1182		Roseovarius sp.	77.8	1e-10
ISAcba1	IS1595	ISSod11	Actinobacteria bacterium	75.8	4e-10
ISMdi11	IS481		Methylobacterium dichloromethanicum	75.8	4e-10
ISGdi16	IS1182		Gluconacetobacter diazotrophicus	75.8	4e-10
ISGdi17	IS21		Gluconacetobacter diazotrophicus	75.8	4e-10
ISPman1	IS21		Pseudomonas mandelii	73.8	2e-09
ISPpu27	IS21		Pseudomonas putida	73.8	2e-09
ISAisp6	IS21		Acidovorax sp.	73.8	2e-09
TnAs3	Tn3		Aeromonas salmonicida	73.8	2e-09
ISMdi4	IS481		Methylobacterium dichloromethanicum	73.8	2e-09
ISThsp5	IS21		Thiomonas sp.	73.8	2e-09
ISThsp2	IS21		Thiomonas sp.	73.8	2e-09
ISRme4	IS21		Cupriavidus metallidurans	73.8	2e-09
ISVapa4	IS21		Variovorax paradoxus	71.9	6e-09
ISMno24	IS91		Methylobacterium nodulans	71.9	6e-09
ISAzs33	IS3	IS150	Azospirillum sp.	71.9	6e-09
ISHha2	IS5		Halorhodospira halophila	71.9	6e-09
ISNha7	IS5		Nitrobacter hamburgensis	71.9	6e-09
ISMno23	IS91		Methylobacterium nodulans	71.9	6e-09
ISArsp14	ISNCY		Arthrobacter sp.	69.9	2e-08
ISCsp4	IS21		Comamonas sp	69.9	2e-08
ISMpo10	Tn3		Methylobacterium populi	69.9	2e-08
ISSpwi1	IS3	IS407	Sphingomonas wittichii	69.9	2e-08
ISPye58	IS5		Paracoccus yeei	67.9	1e-07
ISAzs20	IS66		Azospirillum sp.	67.9	1e-07
ISMch8	IS5	IS5	Methylobacterium chloromethanicum	67.9	1e-07
ISBuce1	IS1182		Burkholderia cepacia	67.9	1e-07
ISPye20	IS5		Paracoccus yeei	65.9	4e-07
ISApr13	IS5		Alpha proteobacterium	65.9	4e-07
ISMpo7	IS5	IS427	Methylobacterium populi	65.9	4e-07
ISAzo26	IS91		Azoarcus sp.	65.9	4e-07
ISGur15	IS21		Geobacter uraniumreducens	65.9	4e-07
ISLisp1	IS21		Limnohabitans sp.	63.9	2e-06
ISRsp13	IS5		Rhizhobium sp.	63.9	2e-06
ISButh5	IS5		Burkholderia thailandensis	63.9	2e-06
ISApr12	IS5		Alpha proteobacterium	63.9	2e-06
ISPam4	IS5	IS427	Paracoccus aminophilus	63.9	2e-06
ISPye21	IS110	IS1111	Paracoccus yeei	61.9	6e-06
ISRhsp7	IS5		Rhodobacter sphaeroides	61.9	6e-06
ISRssp11	IS5		Roseovarius sp.	61.9	6e-06
ISBrsp7	IS5		Bradyrhizobium sp.	61.9	6e-06
ISMex15	IS5	IS427	Methylobacterium extorquens	61.9	6e-06
ISMex1	IS3	IS407	Methylobacterium extorquens	61.9	6e-06
ISBusp2	IS5	IS5	Burkholderia sp.	61.9	6e-06
Sphingopyxis baekryungensis DSM22271
ISSsp2	IS3	IS150	Sphingomonas sp.	1045	0
ISPko4	IS3	IS150	Paracoccus kondratievae	932	0
ISMex37	IS3	IS150	Methylobacterium extorquens	172	1e-42
ISCc3	IS3	IS150	Caulobacter crescentus	125	2e-28
ISMno31	IS3	IS150	Methylobacterium nodulans	111	3e-24
ISMex16	IS3	IS150	Methylobacterium extorquens	111	3e-24
ISMch3	IS3	IS150	Methylobacterium chloromethanicum	103	8e-22
ISMno9	IS1182		Methylobacterium nodulans	246	4e-62
ISRssp12	IS1182		Roseovarius sp.	165	1e-37
ISShsp2	IS1182		Sphingomonas sp.	145	1e-31
ISEli1	IS3	IS407	Erythrobacter litoralis	101	2e-18
ISPye40	IS5	IS427	Paracoccus yeei	93.7	4e-16
ISCfr1	IS1182		Citrobacter freundii	91.7	2e-15
ISPme2	IS5	IS427	Paracoccus methylutens	89.7	6e-15
ISPbe2	IS5	IS427	Paracoccus bengalensis	83.8	4e-13
ISNov3	IS1595	ISNha5	Novosphingobium sp.	77.8	2e-11
ISPsp5	IS1182		Pseudomonas sp.	77.8	2e-11
ISPa94	IS1182		Pseudomonas aeruginosa	73.8	4e-10
ISPaes1	IS5	IS427	Paracoccus aestuarii	73.8	4e-10
ISPko5	IS5	IS427	Paracoccus kondratievae	67.9	2e-08
ISPpa6	IS5	IS427	Paracoccus pantotrophus	67.9	2e-08
ISSsp2	IS3	IS150	Sphingomonas sp.	67.9	2e-08
ISRbac1	IS1182		Rhodobacteraceae bacterium	65.9	9e-08
ISSsp2	IS3	IS150	Sphingomonas sp.	270	2e-69
ISPko4	IS3	IS150	Paracoccus kondratievae	236	3e-59
ISCc3	IS3	IS150	Caulobacter crescentus	85.7	8e-14
IS427	IS5	IS427	Agrobacterium tumefaciens	327	9e-87
ISPye40	IS5	IS427	Paracoccus yeei	93.7	2e-16
ISPme2	IS5	IS427	Paracoccus methylutens	89.7	4e-15
ISPye50	IS5	IS427	Paracoccus yeei	87.7	1e-14
ISPbe2	IS5	IS427	Paracoccus bengalensis	83.8	2e-13
ISPaes1	IS5	IS427	Paracoccus aestuarii	73.8	2e-10
ISPko5	IS5	IS427	Paracoccus kondratievae	67.9	1e-08
ISPpa6	IS5	IS427	Paracoccus pantotrophus	67.9	1e-08
ISEli1	IS3	IS407	Erythrobacter litoralis	1526	0
ISSpma3	IS3	IS407	Sphingopyxis macrogoltabida	591	3e-166
ISPye40	IS5	IS427	Paracoccus yeei	89.7	2e-15
ISMamg2	IS3	IS407	Magnetospirillum magneticum	89.7	2e-15
ISSme1	IS3	IS407	Sinorhizobium medicae	85.7	4e-14
ISRm6	IS3	IS407	Rhizobium meliloti	85.7	4e-14
IS511	IS3	IS407	Caulobacter crescentus	85.7	4e-14
ISAtu5	IS3	IS407	Agrobacterium tumefaciens	83.8	1e-13
ISPye57	IS3	IS407	Paracoccus yeei	81.8	6e-13
ISOba1	IS3	IS407	Oceanicola batsensis	79.8	2e-12
ISPye34	IS3	IS407	Paracoccus yeei	77.8	9e-12
ISXau1	IS3	IS407	Xanthobacter autotrophicus	77.8	9e-12
ISMex1	IS3	IS407	Methylobacterium extorquens	75.8	4e-11
ISPbe2	IS5	IS427	Paracoccus bengalensis	73.8	1e-10
ISPaes1	IS5	IS427	Paracoccus aestuarii	73.8	1e-10
ISRso14	IS3	IS407	Ralstonia solanacearum	73.8	1e-10
ISRde2	IS3	IS407	Roseobacter denitrificans	69.9	2e-09
ISPfe1	IS3	IS407	Paracoccus ferrooxidans	65.9	3e-08
ISMamg1	IS3	IS407	Magnetospirillum magneticum	65.9	3e-08
ISPko5	IS5	IS427	Paracoccus kondratievae	63.9	1e-07
ISRle4	IS3	IS407	Rhizobium leguminosarum	60	2e-06
ISXca1	IS3	IS407	Xanthomonas campestris	58	8e-06
ISSsp2	IS3	IS150	Sphingomonas sp.	222	2e-55
ISPko4	IS3	IS150	Paracoccus kondratievae	182	2e-43
ISKpn25	ISL3		Klebsiella pneumoniae	91.7	5e-16
ISCc3	IS3	IS150	Caulobacter crescentus	87.7	9e-15
ISSm4	ISL3		Serratia marcescens	85.7	3e-14
ISMex37	IS3	IS150	Methylobacterium extorquens	63.9	1e-07
ISSsp2	IS3	IS150	Sphingomonas sp.	270	1e-69
ISPko4	IS3	IS150	Paracoccus kondratievae	236	1e-59
ISCc3	IS3	IS150	Caulobacter crescentus	85.7	3e-14
ISSsp2	IS3	IS150	Sphingomonas sp.	238	3e-60
ISPko4	IS3	IS150	Paracoccus kondratievae	204	4e-50
ISCc3	IS3	IS150	Caulobacter crescentus	107	7e-21
ISMex37	IS3	IS150	Methylobacterium extorquens	79.8	1e-12
ISSsp2	IS3	IS150	Sphingomonas sp.	248	2e-63
ISPko4	IS3	IS150	Paracoccus kondratievae	234	2e-59
ISPa42	Tn3		Pseudomonas aeruginosa	190	3e-46
ISCc3	IS3	IS150	Caulobacter crescentus	85.7	1e-14
TnXo19	Tn3		Xanthomonas oryzae	63.9	5e-08
ISPye40	IS5	IS427	Paracoccus yeei	93.7	5e-17
ISPme2	IS5	IS427	Paracoccus methylutens	89.7	8e-16
ISPbe2	IS5	IS427	Paracoccus bengalensis	83.8	5e-14
ISPaes1	IS5	IS427	Paracoccus aestuarii	73.8	5e-11
ISPko5	IS5	IS427	Paracoccus kondratievae	67.9	3e-09
ISPpa6	IS5	IS427	Paracoccus pantotrophus	67.9	3e-09
Sphingopyxis bauzanensis DSM2271
ISMtsp17	IS110	IS1111	Methylobacterium sp.	77.8	5e-13
ISMex13	IS21		Methylobacterium extorquens	129	4e-29
ISAzs30	IS21		Azospirillum sp.	127	2e-28
ISBmu7	IS21		Burkholderia multivorans	125	6e-28
ISRel3	IS21		Rhizobium etli	113	2e-24
ISMtsp8	IS21		Methylobacterium sp.	101	9e-21
ISPye26	IS110	IS1111	Paracoccus yeei	93.7	2e-18
ISBj11	IS21		Bradyrhizobium japonicum	91.7	9e-18
ISRel5	IS21		Rhizobium etli	91.7	9e-18
ISMtsp17	IS110	IS1111	Methylobacterium sp.	79.8	3e-14
ISPye21	IS110	IS1111	Paracoccus yeei	65.9	5e-10
ISRm9	IS21		Rhizobium meliloti	61.9	8e-09
ISPko7	IS110	IS1111	Paracoccus kondratievae	58	1e-07
ISPye47	IS110	IS1111	Paracoccus yeei	56	5e-07
ISCARN80	IS110	IS1111	Metagenomic data	54	2e-06
ISMlo3	IS110	IS1111	Mesorhizobium loti	54	2e-06
ISGdi14	IS3	IS51	Gluconacetobacter diazotrophicus	353	4e-97
ISAzsp1	IS3	IS51	Azotobacter sp.	91.7	2e-18
ISAzs24	IS3	IS51	Azospirillum sp.	87.7	4e-17
ISDsh1	IS3	IS51	Dinoroseobacter shibae	81.8	2e-15
ISAli4	IS3	IS51	Azospirillum lipoferum	77.8	4e-14
ISRtr2	IS3	IS51	Rhizobium tropici	77.8	4e-14
ISHne1	IS3	IS51	Hyphomonas neptunium	75.8	1e-13
IS868	IS3	IS51	Agrobacterium tumefaciens	73.8	6e-13
IS51	IS3	IS51	Pseudomonas syringae	63.9	6e-10
ISPfr9	IS30		Propionibacterium freudenreichii	54	5e-07
ISMex33	IS3	IS51	Methylobacterium extorquens	54	5e-07
IS401	IS3	IS51	Burkholderia cepacia	52	2e-06
ISMsm8	IS30		Mycobacterium smegmatis	50.1	8e-06
ISNha2	IS701		Nitrobacter hamburgensis	63.9	5e-10
ISBj6_B	IS701		Bradyrhizobium japonicum	58	3e-08
ISNha1	IS701		Nitrobacter hamburgensis	56	1e-07
ISSpwi1	IS3	IS407	Sphingomonas wittichii	1269	0
ISNha9	IS256		Nitrobacter hamburgensis	1039	0
ISSpwi2	IS256		Sphingomonas wittichii	862	0
ISEc61	IS5	IS1031	Escherichia coli	464	2e-127
ISSpma1	IS3	IS407	Sphingopyxis macrogoltabida	454	2e-124
ISRhru4	IS256		Rhodospirillum rubrum	375	1e-100
ISKpn12	IS5	IS427	Klebsiella pneumoniae	369	8e-99
ISAzs28	IS5	IS1031	Azospirillum sp.	319	6e-84
ISMtsp13	IS256		Methylobacterium sp.	303	4e-79
ISGbe1	IS3	IS407	Granulibacter bethesdensis	258	2e-65
ISRtr1	IS256		Rhizobium tropici	254	3e-64
ISSpo7	IS5	IS427	Silicibacter pomeroyi	236	7e-59
ISAzs19	IS256		Azospirillum sp.	224	3e-55
ISAli6	IS256		Azospirillum lipoferum	224	3e-55
ISNha7	IS5		Nitrobacter hamburgensis	212	1e-51
ISApr14	IS256		alpha proteobacterium	202	1e-48
ISBrsp7	IS5		Bradyrhizobium sp.	192	1e-45
ISPebe1	IS256		Pelagibaca bermudensis	188	2e-44
ISPze1	IS5	IS427	Paracoccus zeaxanthinifaciens	176	6e-41
ISPam4	IS5	IS427	Paracoccus aminophilus	163	9e-37
ISRhsp4	IS5	IS427	Rhodobacter sphaeroides	159	1e-35
ISPa42	Tn3		Pseudomonas aeruginosa	145	2e-31
ISPye24	IS5	IS427	Paracoccus yeei	143	8e-31
ISRle12	IS256		Rhizobium leguminosarum	137	5e-29
ISAzba8	IS256		Azospirillum brasilense	133	8e-28
ISPye49	IS5	IS427	Paracoccus yeei	129	1e-26
ISPpa2	IS5	IS427	Paracoccus pantotrophus	125	2e-25
ISPak1	IS5	IS427	Paracoccus alkenifer	123	8e-25
ISRel12	IS481		Rhizobium sp.	121	3e-24
ISPaes2	IS5	IS427	Paracoccus aestuarii	119	1e-23
ISMch8	IS5	IS5	Methylobacterium chloromethanicum	117	5e-23
ISPye51	IS5	IS427	Paracoccus yeei	113	7e-22
IS1248B	IS5	IS427	Paracoccus denitrificans	109	1e-20
IS1248A	IS5	IS427	Paracoccus denitrificans	109	1e-20
ISPso1	IS256		Paracoccus solventivorans	105	2e-19
ISMsi3	IS3	IS407	Methylocella silvestris	103	7e-19
IS1356	IS256		Burkholderia cepacia	103	7e-19
ISPso2	IS5	IS427	Paracoccus solventivorans	101	3e-18
ISRm3G	IS256		Rhizobium meliloti	101	3e-18
ISRm3	IS256		Rhizobium meliloti	101	3e-18
ISPye43	IS256		Paracoccus yeei	99.6	1e-17
ISMdi8	IS481		Methylobacterium dichloromethanicum	99.6	1e-17
ISGdi9	IS481		Gluconacetobacter diazotrophicus	91.7	3e-15
ISNGR8	IS256		Rhizobium sp	91.7	3e-15
ISNwi5	IS481		Nitrobacter winogradskyi	87.7	4e-14
ISPye10	IS5	IS1031	Paracoccus yeei	85.7	2e-13
ISPmar2	IS3	IS407	Paracoccus marcusii	85.7	2e-13
ISNe2	IS481		Nitrosomonas europaea	85.7	2e-13
ISMdi11	IS481		Methylobacterium dichloromethanicum	83.8	7e-13
ISNha4	IS3	IS407	Nitrobacter hamburgensis	83.8	7e-13
ISMex8	IS21		Methylobacterium extorquens	81.8	3e-12
ISRtr4	IS5	IS1031	Rhizobium tropici	81.8	3e-12
ISRso12	IS3	IS407	Ralstonia solanacearum	79.8	1e-11
ISRm4-3	IS5	IS1031	Sinorhizobium meliloti	79.8	1e-11
ISRm4	IS5	IS1031	Rhizobium meliloti	79.8	1e-11
ISAli20	Tn3		Azospirillum lipoferum	77.8	4e-11
ISRso16	IS3	IS407	Ralstonia solanacearum	77.8	4e-11
ISSpal2	IS5		Sphingopyxis alaskensis	75.8	2e-10
ISMex28	IS5	IS5	Methylobacterium extorquens	75.8	2e-10
ISAzs10	IS5		Azospirillum sp.	73.8	6e-10
ISRel16	IS21		Rhizobium etli	73.8	6e-10
ISNha8	IS5		Nitrobacter hamburgensis	73.8	6e-10
ISApr12	IS5		Alpha proteobacterium	73.8	6e-10
ISMtsp20	IS5	IS1031	Methylobacterium sp.	73.8	6e-10
ISCARN47	IS256		Metagenomic data	73.8	6e-10
ISRtr3	IS5	IS1031	Rhizobium tropici	73.8	6e-10
ISBrsp1	IS3	IS407	Bradyrhizobium sp.	73.8	6e-10
ISMex40	IS5	IS1031	Methylobacterium extorquens	71.9	2e-09
ISRl2	IS5	IS1031	Rhizobium leguminosarum	71.9	2e-09
ISPye36	IS3	IS407	Paracoccus yeei	69.9	1e-08
ISPye6	IS3	IS407	Paracoccus yeei	69.9	1e-08
ISEae1	IS256		Enterobacter aerogenes	69.9	1e-08
ISHha2	IS5		Halorhodospira halophila	69.9	1e-08
ISMno14	IS110	IS1111	Methylobacterium nodulans	69.9	1e-08
ISGdi1	IS5	IS1031	Gluconacetobacter diazotrophicus	69.9	1e-08
ISRle5	IS3	IS407	Rhizobium leguminosarum	69.9	1e-08
IS1031D	IS5	IS1031	Acetobacter xylinum	69.9	1e-08
IS1031C	IS5	IS1031	Acetobacter xylinum	69.9	1e-08
ISNisp7	IS5		Nitrobacter sp.	67.9	4e-08
ISSyth1	IS1182		Symbiobacterium thermophilum	67.9	4e-08
ISUnCu14	IS66		uncultured bacterium	65.9	2e-07
ISSpal1	IS481		Sphingopyxis alaskensis	65.9	2e-07
IS1031A	IS5	IS1031	Acetobacter xylinum	65.9	2e-07
ISEc58	IS256		Escherichia coli	63.9	6e-07
ISRsp5	IS5		Rhizobium sp.	63.9	6e-07
ISSpma2	IS256		Sphingopyxis macrogoltabida	63.9	6e-07
ISRhru6	IS5	IS1031	Rhodospirillum rubrum	63.9	6e-07
ISSst1	IS3	IS407	Sagittula stellata	63.9	6e-07
ISPa1328	IS256		Pseudomonas aeruginosa	63.9	6e-07
ISFK1	IS21		Bradyrhizobium japonicum	61.9	2e-06
ISMdi7	IS21		Methylobacterium dichloromethanicum	61.9	2e-06
ISMex38	Tn3		Methylobacterium extorquens	61.9	2e-06
ISRce1	ISAs1		Rhodospirillum centenum	61.9	2e-06
ISCARN61	IS256		Metagenomic data	61.9	2e-06
ISBj12	ISNCY	ISLbi1	Bradyrhizobium japonicum	60	9e-06
ISAzs15	ISAs1		Azospirillum sp.	60	9e-06
ISRel21	IS3	IS407	Rhizobium etli	60	9e-06
ISMdi4	IS481		Methylobacterium dichloromethanicum	60	9e-06
ISGdi8	IS256		Gluconacetobacter diazotrophicus	60	9e-06
ISArsp6	Tn3		Arthrobacter sp.	87.7	3e-17
TnAs2	Tn3		Aeromonas salmonicida	83.8	5e-16
ISMpo10	Tn3		Methylobacterium populi	69.9	7e-12
TnAs3	Tn3		Aeromonas salmonicida	67.9	3e-11
ISPa38	Tn3		Pseudomonas aeruginosa	67.9	3e-11
ISShes11	Tn3		Shewanella sp.	65.9	1e-10
TnShfr1	Tn3		Shewanella frigidimarina	52	2e-06
Tn5393	Tn3		Erwinia amylovora	50.1	7e-06
ISSpal1	IS481		Sphingopyxis alaskensis	157	4e-38
ISFpe1	IS66		Fulvimarina pelagi	50.1	7e-06
ISNha9	IS256		Nitrobacter hamburgensis	1045	0
ISSpwi2	IS256		Sphingomonas wittichii	862	0
ISAzs19	IS256		Azospirillum sp.	224	2e-55
ISNha7	IS5		Nitrobacter hamburgensis	212	8e-52
ISBrsp7	IS5		Bradyrhizobium sp.	192	8e-46
ISApr14	IS256		alpha proteobacterium	165	2e-37
ISRle12	IS256		Rhizobium leguminosarum	137	4e-29
ISRhru4	IS256		Rhodospirillum rubrum	127	4e-26
ISMtsp13	IS256		Methylobacterium sp.	125	1e-25
ISAzba8	IS256		Azospirillum brasilense	125	1e-25
ISMch8	IS5	IS5	Methylobacterium chloromethanicum	117	4e-23
IS1356	IS256		Burkholderia cepacia	103	5e-19
ISPye43	IS256		Paracoccus yeei	99.6	8e-18
ISMdi27	IS21		Methylobacterium dichloromethanicum	97.6	3e-17
ISRm3G	IS256		Rhizobium meliloti	93.7	5e-16
ISRm3	IS256		Rhizobium meliloti	93.7	5e-16
ISMsi1	IS21		Methylocella silvestris	89.7	8e-15
ISRtr1	IS256		Rhizobium tropici	89.7	8e-15
ISMex39	IS21		Methylobacterium extorquens	87.7	3e-14
ISSsp4	IS21		Sphingomonas sp.	87.7	3e-14
ISDev1	IS21		Devosia sp.	81.8	2e-12
ISPebe1	IS256		Pelagibaca bermudensis	77.8	3e-11
ISSpal2	IS5		Sphingopyxis alaskensis	75.8	1e-10
ISMex28	IS5	IS5	Methylobacterium extorquens	75.8	1e-10
ISAzs10	IS5		Azospirillum sp.	73.8	5e-10
ISPkr1	IS21		Paracoccus koreensis	73.8	5e-10
ISNha8	IS5		Nitrobacter hamburgensis	73.8	5e-10
ISApr12	IS5		Alpha proteobacterium	73.8	5e-10
ISRsp3	IS21		Rhizobium sp.	71.9	2e-09
ISHha2	IS5		Halorhodospira halophila	69.9	8e-09
ISRsp18	IS5	IS5	Rhizobium sp.	69.9	8e-09
ISButh3	IS256		Burkholderia thailandensis	67.9	3e-08
ISNisp7	IS5		Nitrobacter sp.	67.9	3e-08
ISSyth1	IS1182		Symbiobacterium thermophilum	67.9	3e-08
ISPa65	IS21		Pseudomonas aeruginosa	65.9	1e-07
ISGdi8	IS256		Gluconacetobacter diazotrophicus	65.9	1e-07
ISAli6	IS256		Azospirillum lipoferum	65.9	1e-07
ISEc58	IS256		Escherichia coli	63.9	5e-07
ISLpn9	IS4	IS10	Legionella pneumophila	63.9	5e-07
ISRsp5	IS5		Rhizobium sp.	63.9	5e-07
ISPa1328	IS256		Pseudomonas aeruginosa	63.9	5e-07
ISRce1	ISAs1		Rhodospirillum centenum	61.9	2e-06
ISAzs15	ISAs1		Azospirillum sp.	60	7e-06
ISRm13	IS5	IS5	Sinorhizobium meliloti	60	7e-06
ISNha9	IS256		Nitrobacter hamburgensis	1045	0
ISSpwi2	IS256		Sphingomonas wittichii	862	0
ISEc61	IS5	IS1031	Escherichia coli	488	8e-135
ISAzs28	IS5	IS1031	Azospirillum sp.	359	5e-96
ISAzs19	IS256		Azospirillum sp.	224	2e-55
ISSsp4	IS21		Sphingomonas sp.	202	7e-49
ISApr14	IS256		alpha proteobacterium	165	1e-37
ISMex39	IS21		Methylobacterium extorquens	157	3e-35
ISRle12	IS256		Rhizobium leguminosarum	137	3e-29
ISDev1	IS21		Devosia sp.	135	1e-28
ISGdi14	IS3	IS51	Gluconacetobacter diazotrophicus	129	8e-27
ISAzba8	IS256		Azospirillum brasilense	125	1e-25
ISMdi27	IS21		Methylobacterium dichloromethanicum	119	8e-24
ISMsi3	IS3	IS407	Methylocella silvestris	103	5e-19
IS1356	IS256		Burkholderia cepacia	103	5e-19
ISPye43	IS256		Paracoccus yeei	99.6	7e-18
ISRm3G	IS256		Rhizobium meliloti	93.7	4e-16
ISRm3	IS256		Rhizobium meliloti	93.7	4e-16
ISPa36	IS21		Pseudomonas aeruginosa	91.7	2e-15
ISAav1	IS21		Acidovorax avenae	91.7	2e-15
ISRsp3	IS21		Rhizobium sp.	89.7	7e-15
ISMsi1	IS21		Methylocella silvestris	87.7	3e-14
ISMlo4	IS3	IS51	Mesorhizobium loti	87.7	3e-14
ISRso12	IS3	IS407	Ralstonia solanacearum	87.7	3e-14
ISMno24	IS91		Methylobacterium nodulans	83.8	4e-13
ISPye10	IS5	IS1031	Paracoccus yeei	81.8	2e-12
ISBdi7	IS21		Bradyrhizobium diazoefficiens	77.8	3e-11
ISRso16	IS3	IS407	Ralstonia solanacearum	77.8	3e-11
ISPa65	IS21		Pseudomonas aeruginosa	75.8	1e-10
ISRme4	IS21		Cupriavidus metallidurans	75.8	1e-10
ISRle5	IS3	IS407	Rhizobium leguminosarum	73.8	4e-10
ISRtr4	IS5	IS1031	Rhizobium tropici	73.8	4e-10
ISRtr3	IS5	IS1031	Rhizobium tropici	73.8	4e-10
ISVapa2	IS21		Variovorax paradoxus	71.9	2e-09
ISPkr1	IS21		Paracoccus koreensis	71.9	2e-09
ISMno23	IS91		Methylobacterium nodulans	71.9	2e-09
ISSsp2	IS3	IS150	Sphingomonas sp.	71.9	2e-09
ISSst1	IS3	IS407	Sagittula stellata	71.9	2e-09
ISRl2	IS5	IS1031	Rhizobium leguminosarum	71.9	2e-09
ISGdi1	IS5	IS1031	Gluconacetobacter diazotrophicus	69.9	6e-09
ISButh3	IS256		Burkholderia thailandensis	67.9	2e-08
ISRso14	IS3	IS407	Ralstonia solanacearum	67.9	2e-08
ISRm4-3	IS5	IS1031	Sinorhizobium meliloti	67.9	2e-08
ISRm4	IS5	IS1031	Rhizobium meliloti	67.9	2e-08
ISMtsp20	IS5	IS1031	Methylobacterium sp.	65.9	1e-07
ISAzo26	IS91		Azoarcus sp.	65.9	1e-07
ISXau2	IS3	IS51	Xanthobacter autotrophicus	65.9	1e-07
ISBrsp1	IS3	IS407	Bradyrhizobium sp.	65.9	1e-07
IS868	IS3	IS51	Agrobacterium tumefaciens	65.9	1e-07
ISEc58	IS256		Escherichia coli	63.9	4e-07
ISRhru6	IS5	IS1031	Rhodospirillum rubrum	63.9	4e-07
ISMex40	IS5	IS1031	Methylobacterium extorquens	63.9	4e-07
ISPa1328	IS256		Pseudomonas aeruginosa	63.9	4e-07
IS1031D	IS5	IS1031	Acetobacter xylinum	63.9	4e-07
IS1031A	IS5	IS1031	Acetobacter xylinum	63.9	4e-07
ISArsp14	ISNCY		Arthrobacter sp.	61.9	2e-06
ISPa63	IS21		Pseudomonas aeruginosa	61.9	2e-06
ISMch5	IS3	IS51	Methylobacterium chloromethanicum	61.9	2e-06
ISRce1	ISAs1		Rhodospirillum centenum	61.9	2e-06
ISAzsp1	IS3	IS51	Azotobacter sp.	61.9	2e-06
ISAzs15	ISAs1		Azospirillum sp.	60	6e-06
ISRel21	IS3	IS407	Rhizobium etli	60	6e-06
ISCARN16	IS21		Metagenomic data	60	6e-06
ISYpe1	IS3	IS407	Yersinia pestis	60	6e-06
ISOba2	IS3	IS407	Oceanicola batsensis	60	6e-06
ISYps8	IS3	IS407	Yersinia pseudotuberculosis	60	6e-06
ISPye39	IS5	IS427	Paracoccus yeei	345	5e-92
TnXo19	Tn3		Xanthomonas oryzae	123	3e-25
ISMno14	IS110	IS1111	Methylobacterium nodulans	69.9	4e-09
ISPye39	IS5	IS427	Paracoccus yeei	345	1e-92
ISPye47	IS110	IS1111	Paracoccus yeei	73.8	8e-11
ISMno14	IS110	IS1111	Methylobacterium nodulans	69.9	1e-09
ISNha9	IS256		Nitrobacter hamburgensis	611	7e-173
ISSpwi2	IS256		Sphingomonas wittichii	498	7e-139
ISApr14	IS256		alpha proteobacterium	254	2e-65
ISGdi14	IS3	IS51	Gluconacetobacter diazotrophicus	238	1e-60
ISSpal1	IS481		Sphingopyxis alaskensis	212	6e-53
ISBj11	IS21		Bradyrhizobium japonicum	143	5e-32
ISBmu7	IS21		Burkholderia multivorans	139	7e-31
ISRel5	IS21		Rhizobium etli	137	3e-30
ISAzs19	IS256		Azospirillum sp.	125	1e-26
ISAzba8	IS256		Azospirillum brasilense	115	1e-23
ISMdi5	IS3	IS3	Methylobacterium dichloromethanicum	107	2e-21
ISMex39	IS21		Methylobacterium extorquens	99.6	6e-19
ISRm9	IS21		Rhizobium meliloti	95.6	9e-18
ISDev1	IS21		Devosia sp.	93.7	4e-17
ISRle12	IS256		Rhizobium leguminosarum	93.7	4e-17
ISRm3	IS256		Rhizobium meliloti	93.7	4e-17
ISMdi27	IS21		Methylobacterium dichloromethanicum	87.7	2e-15
ISSsp4	IS21		Sphingomonas sp.	87.7	2e-15
ISAzs24	IS3	IS51	Azospirillum sp.	85.7	9e-15
ISRm3G	IS256		Rhizobium meliloti	85.7	9e-15
ISNGR8	IS256		Rhizobium sp	85.7	9e-15
IS1356	IS256		Burkholderia cepacia	81.8	1e-13
ISPye32	IS110	IS1111	Paracoccus yeei	75.8	9e-12
ISMdi25	IS30		Methylobacterium dichloromethanicum	75.8	9e-12
ISRel16	IS21		Rhizobium etli	73.8	3e-11
ISAtu7	IS110		Agrobacterium tumefaciens	73.8	3e-11
ISMsi1	IS21		Methylocella silvestris	73.8	3e-11
ISDsh1	IS3	IS51	Dinoroseobacter shibae	73.8	3e-11
ISRta2	IS256		Ralstonia taiwanensis	71.9	1e-10
ISGau8	IS30		Gemmatimonas aurantiaca	67.9	2e-09
ISPkr1	IS21		Paracoccus koreensis	67.9	2e-09
ISAli4	IS3	IS51	Azospirillum lipoferum	67.9	2e-09
ISAav1	IS21		Acidovorax avenae	67.9	2e-09
ISEc58	IS256		Escherichia coli	65.9	8e-09
ISThsp11	IS3	IS3	Thiomonas sp.	63.9	3e-08
ISHne1	IS3	IS51	Hyphomonas neptunium	63.9	3e-08
ISVapa2	IS21		Variovorax paradoxus	61.9	1e-07
ISRel12	IS481		Rhizobium sp.	61.9	1e-07
ISFK1	IS21		Bradyrhizobium japonicum	61.9	1e-07
ISAZo16	IS21		Azoarcus sp.	61.9	1e-07
ISButh3	IS256		Burkholderia thailandensis	60	5e-07
ISPa65	IS21		Pseudomonas aeruginosa	60	5e-07
ISPa1328	IS256		Pseudomonas aeruginosa	60	5e-07
ISUnCu3	IS21		Uncultured bacterium	58	2e-06
ISBcen18	IS256		Burkholderia cenocepacia	58	2e-06
ISPa77	IS21		Pseudomonas aeruginosa	56	8e-06
ISPa36	IS21		Pseudomonas aeruginosa	56	8e-06
ISMtsp4	IS30		Methylobacterium sp.	56	8e-06
ISCARN45	IS256		Metagenomic data	56	8e-06
ISRsp3	IS21		Rhizobium sp.	56	8e-06
ISRso7	IS256		Ralstonia solanacearum	56	8e-06
ISPpu7	IS21		Pseudomonas putida	56	8e-06
ISSpwi2	IS256		Sphingomonas wittichii	660	0
ISNha9	IS256		Nitrobacter hamburgensis	609	3e-172
ISApr14	IS256		alpha proteobacterium	151	2e-34
ISPpa5	IS66		Paracoccus pantotrophus	145	1e-32
ISGdi14	IS3	IS51	Gluconacetobacter diazotrophicus	123	4e-26
ISAzs19	IS256		Azospirillum sp.	109	6e-22
ISAzba8	IS256		Azospirillum brasilense	101	2e-19
ISMdi5	IS3	IS3	Methylobacterium dichloromethanicum	99.6	6e-19
ISMsi3	IS3	IS407	Methylocella silvestris	91.7	1e-16
ISRso12	IS3	IS407	Ralstonia solanacearum	79.8	6e-13
ISRm3G	IS256		Rhizobium meliloti	79.8	6e-13
ISRm3	IS256		Rhizobium meliloti	79.8	6e-13
ISRle12	IS256		Rhizobium leguminosarum	77.8	2e-12
ISSisp1	IS3	IS407	Silicibacter sp.	73.8	3e-11
ISBrsp1	IS3	IS407	Bradyrhizobium sp.	73.8	3e-11
ISRel21	IS3	IS407	Rhizobium etli	67.9	2e-09
IS1356	IS256		Burkholderia cepacia	65.9	8e-09
ISSst1	IS3	IS407	Sagittula stellata	63.9	3e-08
ISMamg1	IS3	IS407	Magnetospirillum magneticum	61.9	1e-07
IS868	IS3	IS51	Agrobacterium tumefaciens	61.9	1e-07
ISRso14	IS3	IS407	Ralstonia solanacearum	60	5e-07
ISNGR8	IS256		Rhizobium sp	60	5e-07
ISRle5	IS3	IS407	Rhizobium leguminosarum	58	2e-06
IS1355	IS5	IS1031	Methylobacterium dichloromethanicum	56	8e-06
ISMex39	IS21		Methylobacterium extorquens	145	8e-33
ISDev1	IS21		Devosia sp.	141	1e-31
ISSsp4	IS21		Sphingomonas sp.	131	1e-28
ISMdi27	IS21		Methylobacterium dichloromethanicum	107	2e-21
ISPa36	IS21		Pseudomonas aeruginosa	93.7	3e-17
ISVapa2	IS21		Variovorax paradoxus	87.7	2e-15
ISRsp3	IS21		Rhizobium sp.	87.7	2e-15
ISAav1	IS21		Acidovorax avenae	87.7	2e-15
ISPa65	IS21		Pseudomonas aeruginosa	81.8	1e-13
ISRme4	IS21		Cupriavidus metallidurans	81.8	1e-13
ISBdi7	IS21		Bradyrhizobium diazoefficiens	77.8	1e-12
ISMsi1	IS21		Methylocella silvestris	77.8	1e-12
ISPkr1	IS21		Paracoccus koreensis	69.9	4e-10
ISPa63	IS21		Pseudomonas aeruginosa	60	4e-07
ISAlde1	IS21		Alicycliphilus denitrificans	58	1e-06
ISCARN16	IS21		Metagenomic data	58	1e-06
Sphingopyxis flava R11H
ISPye35	IS630		Paracoccus yeei	83.8	5e-16
ISMex41	IS630		Methylobacterium extorquens	81.8	2e-15
ISSpo6	IS630		Silicibacter pomeroyi	63.9	5e-10
ISAzs37	IS630		Azospirillum sp.	65.9	1e-10
ISMex41	IS630		Methylobacterium extorquens	58	3e-08
ISMdi1	IS630		Methylobacterium dichloromethanicum	58	3e-08
ISBj5	IS630		Bradyrhizobium japonicum	69.9	8e-12
ISMex18	IS630		Methylobacterium extorquens	69.9	8e-12
ISMsm2	IS630		Mycobacterium smegmatis	54	5e-07
ISRjo2	IS630		Rhodococcus jostii	52	2e-06
ISPve1	IS21		Paracoccus versutus	450	2e-126
ISSsp5	IS21		Sphingomonas sp.	434	1e-121
ISMdi7	IS21		Methylobacterium dichloromethanicum	54	5e-07
ISMex8	IS21		Methylobacterium extorquens	50.1	7e-06
ISUnCu14	IS66		uncultured bacterium	89.7	9e-18
ISApr6	IS66		Alpha proteobacterium	69.9	8e-12
ISNisp6	IS66		Nitrobacter sp.	67.9	3e-11
ISPye33	IS66		Paracoccus yeei	63.9	5e-10
ISMno13	IS66		Methylobacterium nodulans	63.9	5e-10
ISFpe1	IS66		Fulvimarina pelagi	52	2e-06
ISAli15	IS66		Azospirillum lipoferum	52	2e-06
ISMpo10	Tn3		Methylobacterium populi	65.9	1e-10
ISThsp9	Tn3		Thiomonas sp.	58	3e-08
ISXc4	Tn3		Xanthomonas campestris	58	3e-08
ISPve1	IS21		Paracoccus versutus	565	6e-161
ISSsp5	IS21		Sphingomonas sp.	357	3e-98
ISMex8	IS21		Methylobacterium extorquens	58	3e-08
ISRm1	IS3	IS2	Rhizobium meliloti	89.7	1e-17
ISBugl1	IS3	IS2	Burkholderia glumae	89.7	1e-17
IS1417	IS3	IS2	Burkholderia glumae	81.8	2e-15
ISRso10	IS3	IS2	Ralstonia solanacearum	73.8	6e-13
ISPa56	IS3	IS2	Pseudomonas aeruginosa	67.9	4e-11
ISButh2	IS3	IS2	Burkholderia thailandensis	67.9	4e-11
ISEc36	IS3	IS2	Escherichia coli	60	9e-09
ISEc27	IS3	IS2	Escherichia coli	60	9e-09
ISEcl1	IS3	IS2	Enterobacter cloacae	58	3e-08
IS1312	IS3	IS2	Agrobacterium tumefaciens	56	1e-07
ISAs17	IS3	IS2	Aeromonas salmonicida	54	5e-07
ISButh1	IS3	IS2	Burkholderia thailandensis	54	5e-07
ISBcen6	IS3	IS2	Burkholderia cenocepacia	52	2e-06
IS1247	IS1380		Xanthobacter autotrophicus	3313	0
ISKpn23	IS1380		Klebsiella pneumoniae	1687	0
ISPme1	IS1380		Paracoccus methylutens	1362	0
ISApr9	IS1380		Alpha proteobacterium	1324	0
ISApr11	IS1380		Alpha proteobacterium	1237	0
ISOan2	IS1380		Octadecabacter antarcticus	906	0
ISRssp9	IS1380		Roseovarius sp.	192	1e-48
ISApr8	IS1380		Alpha proteobacterium	69.9	1e-11
ISSpo2	IS1380		Silicibacter pomeroyi	63.9	8e-10
ISKpn12	IS5	IS427	Klebsiella pneumoniae	329	7e-89
ISRhsp4	IS5	IS427	Rhodobacter sphaeroides	200	5e-50
ISSpo7	IS5	IS427	Silicibacter pomeroyi	172	1e-41
ISPaes2	IS5	IS427	Paracoccus aestuarii	155	2e-36
ISPye49	IS5	IS427	Paracoccus yeei	153	1e-35
ISPam4	IS5	IS427	Paracoccus aminophilus	149	2e-34
ISPpa2	IS5	IS427	Paracoccus pantotrophus	123	9e-27
ISPze1	IS5	IS427	Paracoccus zeaxanthinifaciens	119	1e-25
ISPak1	IS5	IS427	Paracoccus alkenifer	113	8e-24
IS1248B	IS5	IS427	Paracoccus denitrificans	103	8e-21
IS1248A	IS5	IS427	Paracoccus denitrificans	103	8e-21
ISPye51	IS5	IS427	Paracoccus yeei	101	3e-20
ISPye24	IS5	IS427	Paracoccus yeei	97.6	5e-19
ISPso2	IS5	IS427	Paracoccus solventivorans	73.8	7e-12
IS1247	IS1380		Xanthobacter autotrophicus	188	7e-47
ISPme1	IS1380		Paracoccus methylutens	85.7	8e-16
ISApr9	IS1380		Alpha proteobacterium	71.9	1e-11
ISKpn23	IS1380		Klebsiella pneumoniae	65.9	7e-10
ISSpma1	IS3	IS407	Sphingopyxis macrogoltabida	345	2e-93
ISGbe1	IS3	IS407	Granulibacter bethesdensis	137	7e-31
ISSsp126	IS5	IS5	Sphingomonas sp.	111	4e-23
ISNha4	IS3	IS407	Nitrobacter hamburgensis	101	4e-20
ISSpwi1	IS3	IS407	Sphingomonas wittichii	99.6	2e-19
ISMsi4	IS3	IS407	Methylocella silvestris	75.8	2e-12
ISMsi2	IS3	IS407	Methylocella silvestris	67.9	5e-10
ISPmar2	IS3	IS407	Paracoccus marcusii	61.9	3e-08
ISAzs11	ISAs1		Azospirillum sp.	113	1e-22
ISPpa5	IS66		Paracoccus pantotrophus	103	2e-20
Tn5393	Tn3		Erwinia amylovora	357	8e-97
IS1247	IS1380		Xanthobacter autotrophicus	184	6e-45
ISBj11	IS21		Bradyrhizobium japonicum	167	1e-39
ISRel5	IS21		Rhizobium etli	141	8e-32
ISBmu7	IS21		Burkholderia multivorans	131	8e-29
ISRm9	IS21		Rhizobium meliloti	97.6	1e-18
ISAZo16	IS21		Azoarcus sp.	75.8	4e-12
ISThsp9	Tn3		Thiomonas sp.	61.9	6e-08
ISKpn12	IS5	IS427	Klebsiella pneumoniae	266	2e-69
ISPze1	IS5	IS427	Paracoccus zeaxanthinifaciens	121	8e-26
ISPaes2	IS5	IS427	Paracoccus aestuarii	121	8e-26
ISSpo7	IS5	IS427	Silicibacter pomeroyi	119	3e-25
ISPak1	IS5	IS427	Paracoccus alkenifer	115	5e-24
ISPye24	IS5	IS427	Paracoccus yeei	113	2e-23
ISGdi4	IS630		Gluconacetobacter diazotrophicus	113	2e-23
ISPye49	IS5	IS427	Paracoccus yeei	101	7e-20
ISRhsp4	IS5	IS427	Rhodobacter sphaeroides	97.6	1e-18
ISMno21	IS630		Methylobacterium nodulans	93.7	2e-17
ISPye51	IS5	IS427	Paracoccus yeei	79.8	3e-13
ISGdi5	IS630		Gluconacetobacter diazotrophicus	65.9	4e-09
IS1248B	IS5	IS427	Paracoccus denitrificans	58	1e-06
IS1248A	IS5	IS427	Paracoccus denitrificans	58	1e-06
ISMesp1	IS1595	ISNwi1	Mesorhizobium sp.	81.8	9e-14
ISNwi3	IS1595	ISNwi1	Nitrobacter winogradskyi	58	1e-06
IS1247	IS1380		Xanthobacter autotrophicus	188	6e-46
ISPme1	IS1380		Paracoccus methylutens	85.7	6e-15
ISApr9	IS1380		Alpha proteobacterium	71.9	1e-10
ISKpn23	IS1380		Klebsiella pneumoniae	65.9	6e-09
ISAli13	IS21		Azospirillum lipoferum	93.7	1e-18
ISBmu7	IS21		Burkholderia multivorans	54	9e-07
ISBj11	IS21		Bradyrhizobium japonicum	52	4e-06
ISPye47	IS110	IS1111	Paracoccus yeei	58	5e-07
ISPye60	IS4	IS50	Paracoccus yeei	56	2e-06
ISMtsp17	IS110	IS1111	Methylobacterium sp.	54	8e-06
ISRhru5	IS5	IS427	Rhodospirillum rubrum	56	2e-07
ISAzs17	Tn3		Azospirillum sp.	127	2e-27
ISGdi4	IS630		Gluconacetobacter diazotrophicus	105	4e-20
ISMno21	IS630		Methylobacterium nodulans	93.7	1e-16
ISGdi5	IS630		Gluconacetobacter diazotrophicus	65.9	3e-08
ISRle11	IS1182		Rhizobium leguminosarum	60	2e-06
ISSpma2	IS256		Sphingopyxis macrogoltabida	1193	0
ISPye4	IS1182		Paracoccus yeei	918	0
ISAli7	IS256		Azospirillum lipoferum	109	4e-23
ISMex14	IS256		Methylobacterium extorquens	107	2e-22
ISMno32	IS1182		Methylobacterium nodulans	85.7	6e-16
ISMno17	IS1182		Methylobacterium nodulans	85.7	6e-16
IS6100	IS6		Mycobacterium fortuitum	188	5e-47
ISPlc1	IS5	IS903	Paracoccus alcaliphilus	430	4e-118
ISPko1	IS5	IS903	Paracoccus kondratievae	299	9e-79
ISSisp2	IS5	IS903	Silicibacter sp.	264	5e-68
ISSsp4	IS21		Sphingomonas sp.	248	3e-63
ISRusp1	IS5	IS903	Ruegeria sp.	212	2e-52
ISSpo9	IS5	IS903	Silicibacter pomeroyi	192	1e-46
ISPpa8	IS5	IS903	Paracoccus pantotrophus	170	5e-40
ISPko3	IS5	IS903	Paracoccus kondratievae	161	5e-37
ISOgr3	IS5	IS903	Oceanicola granulosus	149	2e-33
ISPye12	IS5	IS903	Paracoccus yeei	145	3e-32
ISTasp1	IS5	IS903	Thalassiobium sp.	97.6	6e-18
ISPa63	IS21		Pseudomonas aeruginosa	69.9	1e-09
ISPve1	IS21		Paracoccus versutus	65.9	2e-08
ISMex39	IS21		Methylobacterium extorquens	65.9	2e-08
ISBdi7	IS21		Bradyrhizobium diazoefficiens	60	1e-06
ISOan4	IS5	IS903	Octadecabacter antarcticus	60	1e-06
ISPkr1	IS21		Paracoccus koreensis	58	5e-06
ISMdi27	IS21		Methylobacterium dichloromethanicum	58	5e-06
ISGdi4	IS630		Gluconacetobacter diazotrophicus	113	3e-23
ISMno21	IS630		Methylobacterium nodulans	93.7	3e-17
ISGdi5	IS630		Gluconacetobacter diazotrophicus	65.9	6e-09
ISAzs11	ISAs1		Azospirillum sp.	105	6e-21
ISApr6	IS66		Alpha proteobacterium	117	9e-26
ISNisp6	IS66		Nitrobacter sp.	109	2e-23
ISSp1	IS1380		Sphingomonas paucimobilis	93.7	1e-18
IS1412	IS1380		Sphingomonas sp.	93.7	1e-18
ISAzca2	IS66		Azorhizobium caulinodans	77.8	8e-14
ISFpe1	IS66		Fulvimarina pelagi	73.8	1e-12
ISUnCu14	IS66		uncultured bacterium	71.9	5e-12
ISMno13	IS66		Methylobacterium nodulans	71.9	5e-12
ISXau4	IS66		Xanthobacter autotrophicus	61.9	5e-09
IS6100	IS6		Mycobacterium fortuitum	188	6e-46
ISPve1	IS21		Paracoccus versutus	537	6e-151
ISSsp5	IS21		Sphingomonas sp.	319	2e-85
ISSpma2	IS256		Sphingopyxis macrogoltabida	157	2e-36
ISFlsp1	IS21		Flavobacterium sp	79.8	4e-13
ISMex8	IS21		Methylobacterium extorquens	69.9	4e-10
ISPye39	IS5	IS427	Paracoccus yeei	58	1e-06
ISMdi7	IS21		Methylobacterium dichloromethanicum	58	1e-06
ISPve1	IS21		Paracoccus versutus	97.6	5e-18
ISSpma2	IS256		Sphingopyxis macrogoltabida	494	2e-138
ISPye32	IS110	IS1111	Paracoccus yeei	87.7	4e-16
ISMex14	IS256		Methylobacterium extorquens	83.8	7e-15
ISAli7	IS256		Azospirillum lipoferum	79.8	1e-13
ISAtu7	IS110		Agrobacterium tumefaciens	77.8	4e-13
IS1311	IS256		Mycobacterium avium	65.9	2e-09
ISPso1	IS256		Paracoccus solventivorans	63.9	6e-09
ISRhru4	IS256		Rhodospirillum rubrum	63.9	6e-09
ISPebe1	IS256		Pelagibaca bermudensis	61.9	3e-08
ISEae1	IS256		Enterobacter aerogenes	56	2e-06
ISGdi8	IS256		Gluconacetobacter diazotrophicus	56	2e-06
ISAli13	IS21		Azospirillum lipoferum	93.7	7e-18
ISBmu7	IS21		Burkholderia multivorans	54	6e-06
IS6100	IS6		Mycobacterium fortuitum	188	1e-47
ISAzs11	ISAs1		Azospirillum sp.	63.9	5e-09
ISPve1	IS21		Paracoccus versutus	54	1e-06
ISSsp5	IS21		Sphingomonas sp.	54	1e-06
IS6100	IS6		Mycobacterium fortuitum	188	5e-47
ISAzs17	Tn3		Azospirillum sp.	99.6	1e-19
IS6100	IS6		Mycobacterium fortuitum	188	2e-46
IS1247	IS1380		Xanthobacter autotrophicus	188	2e-46
ISPme1	IS1380		Paracoccus methylutens	85.7	2e-15
ISApr9	IS1380		Alpha proteobacterium	71.9	3e-11
ISKpn23	IS1380		Klebsiella pneumoniae	65.9	2e-09
ISRle12	IS256		Rhizobium leguminosarum	121	3e-26
ISMmg1	IS110	IS1111	Magnetospirillum magnetotacticum	81.8	2e-14
ISAzs19	IS256		Azospirillum sp.	75.8	2e-12
ISMno16	IS110	IS1111	Methylobacterium nodulans	71.9	2e-11
ISApr14	IS256		alpha proteobacterium	67.9	4e-10
ISRm3G	IS256		Rhizobium meliloti	65.9	1e-09
ISRm3	IS256		Rhizobium meliloti	61.9	2e-08
ISPye21	IS110	IS1111	Paracoccus yeei	60	9e-08
ISAzba8	IS256		Azospirillum brasilense	60	9e-08
ISEc58	IS256		Escherichia coli	56	1e-06
ISAzvi12	IS110	IS1111	Azotobacter vinelandii	54	6e-06
ISSpma1	IS3	IS407	Sphingopyxis macrogoltabida	1017	0
ISGbe1	IS3	IS407	Granulibacter bethesdensis	521	8e-147
ISSpwi1	IS3	IS407	Sphingomonas wittichii	498	1e-139
ISAli9	IS5	IS427	Azospirillum lipoferum	93.7	6e-18
ISAzs9	IS5	IS427	Azospirillum sp.	87.7	4e-16
ISPye36	IS3	IS407	Paracoccus yeei	73.8	6e-12
ISPye6	IS3	IS407	Paracoccus yeei	73.8	6e-12
ISPmar2	IS3	IS407	Paracoccus marcusii	67.9	4e-10
ISDet3	IS3	IS407	Dehalococcoides mccartyi	56	1e-06
ISDsp5	IS3	IS407	Dehalococcoides sp.	56	1e-06
ISMt1	IS5	IS427	Mycobacterium tuberculosis	56	1e-06
ISSpma2	IS256		Sphingopyxis macrogoltabida	268	1e-69
ISMex14	IS256		Methylobacterium extorquens	67.9	2e-09
ISSpma2	IS256		Sphingopyxis macrogoltabida	283	2e-75
ISMex14	IS256		Methylobacterium extorquens	67.9	2e-10
ISBj11	IS21		Bradyrhizobium japonicum	180	7e-45
ISBmu7	IS21		Burkholderia multivorans	159	2e-38
ISRel5	IS21		Rhizobium etli	137	9e-32
ISRm9	IS21		Rhizobium meliloti	99.6	2e-20
ISAZo16	IS21		Azoarcus sp.	73.8	1e-12
ISCARN49	IS21		Metagenomic data	56	3e-07
ISAli13	IS21		Azospirillum lipoferum	52	4e-06
ISRle12	IS256		Rhizobium leguminosarum	285	9e-77
ISRm3	IS256		Rhizobium meliloti	216	7e-56
ISRm3G	IS256		Rhizobium meliloti	208	2e-53
ISNGR8	IS256		Rhizobium sp	208	2e-53
ISNha9	IS256		Nitrobacter hamburgensis	125	2e-28
ISApr14	IS256		alpha proteobacterium	115	2e-25
ISAzba8	IS256		Azospirillum brasilense	113	7e-25
ISAzs19	IS256		Azospirillum sp.	111	3e-24
ISCsp1	IS256		Comamonas sp	97.6	4e-20
IS1356	IS256		Burkholderia cepacia	93.7	7e-19
ISSpwi2	IS256		Sphingomonas wittichii	83.8	6e-16
ISXax1	IS256		Xanthomonas axonopodis	81.8	2e-15
ISEc58	IS256		Escherichia coli	71.9	2e-12
ISRta2	IS256		Ralstonia taiwanensis	71.9	2e-12
ISPa1328	IS256		Pseudomonas aeruginosa	71.9	2e-12
ISPa73	IS256		Pseudomonas aeruginosa	69.9	9e-12
ISCARN45	IS256		Metagenomic data	67.9	4e-11
ISEic2	IS256		Edwardsiella ictaluri	65.9	1e-10
IS1090	IS256		Ralstonia eutropha	63.9	6e-10
ISPsy17	IS256		Pseudomonas syringae	61.9	2e-09
ISRso7	IS256		Ralstonia solanacearum	58	4e-08
ISPa46	IS256		Pseudomonas aeruginosa	56	1e-07
ISPa27	IS256		Pseudomonas aeruginosa	56	1e-07
ISMca5	IS256		Methylococcus capsulatus	56	1e-07
ISBcen18	IS256		Burkholderia cenocepacia	50.1	9e-06
ISSsp5	IS21		Sphingomonas sp.	67.9	1e-10
ISPve1	IS21		Paracoccus versutus	60	2e-08
ISMch1	IS3	IS150	Methylobacterium chloromethanicum	54	4e-06
ISMex22	Tn3		Methylobacterium extorquens	167	3e-40
ISArsp6	Tn3		Arthrobacter sp.	101	1e-20
TnAs2	Tn3		Aeromonas salmonicida	83.8	3e-15
ISPa38	Tn3		Pseudomonas aeruginosa	75.8	8e-13
ISAzs29	Tn3		Azospirillum sp.	56	8e-07
ISAzs17	Tn3		Azospirillum sp.	54	3e-06
ISMpo10	Tn3		Methylobacterium populi	3114	0
IS6100	IS6		Mycobacterium fortuitum	494	9e-139
ISAzs29	Tn3		Azospirillum sp.	73.8	3e-12
ISMex38	Tn3		Methylobacterium extorquens	71.9	1e-11
ISPa38	Tn3		Pseudomonas aeruginosa	65.9	7e-10
TnAs2	Tn3		Aeromonas salmonicida	56	7e-07
ISAcr2	IS6		Acidiphilium cryptum	54	3e-06
ISPko4	IS3	IS150	Paracoccus kondratievae	121	1e-26
ISSsp2	IS3	IS150	Sphingomonas sp.	97.6	2e-19
ISCc3	IS3	IS150	Caulobacter crescentus	52	1e-05
ISPps1	IS91		Pseudomonas huttiensis	3350	0
ISAisp1	IS1595	ISSod11	Acidovorax sp.	1318	0
ISCsp2	IS1595	ISSod11	Comamonas sp.	1304	0
ISAisp5	IS1595	ISSod11	Acidovorax sp.	987	0
ISAcde1	IS1595	ISSod11	Acidovorax delafieldii	805	0
ISVasp3	IS1595	ISSod11	Variovorax sp.	182	4e-45
ISVapa1	IS1595	ISSod11	Variovorax paradoxus	165	9e-40
ISAisp8	IS1595	ISSod11	Acidovorax sp.	159	6e-38
ISRsy1	IS1595	ISSod11	Ralstonia syzygii	123	3e-27
ISBba1	IS1595	ISSod11	Burkholderiaceae bacterium	107	2e-22
ISPosp3	IS1595	ISSod11	Polaromonas sp.	105	7e-22
ISRama1	IS1595	ISSod11	Ralstonia mannitolilytica	91.7	1e-17
ISVasp4	IS1595	ISSod11	Variovorax sp.	81.8	1e-14
ISSptr1	IS1595	ISSod11	Spongiibacter tropicus	81.8	1e-14
ISBusp8	IS1595	ISSod11	Burkholderia sp.	71.9	1e-11
ISAzbe2	IS1595	ISSod11	Azotobacter beijerinckii	60	4e-08
ISAzs17	Tn3		Azospirillum sp.	65.9	5e-10
ISAzs29	Tn3		Azospirillum sp.	61.9	8e-09
TnAs3	Tn3		Aeromonas salmonicida	54	2e-06
ISShes11	Tn3		Shewanella sp.	54	2e-06
ISPve1	IS21		Paracoccus versutus	60	3e-08
ISSsp5	IS21		Sphingomonas sp.	54	2e-06
ISGdi4	IS630		Gluconacetobacter diazotrophicus	113	2e-24
ISMno21	IS630		Methylobacterium nodulans	93.7	2e-18
ISGdi5	IS630		Gluconacetobacter diazotrophicus	65.9	5e-10
ISAli14	ISAs1		Azospirillum lipoferum	50.1	8e-06
ISPve1	IS21		Paracoccus versutus	73.8	1e-12
ISSpwi1	IS3	IS407	Sphingomonas wittichii	278	2e-72
ISMdi5	IS3	IS3	Methylobacterium dichloromethanicum	137	4e-30
ISMex41	IS630		Methylobacterium extorquens	85.7	1e-14
ISGbe1	IS3	IS407	Granulibacter bethesdensis	83.8	5e-14
ISMdi20	IS630		Methylobacterium dichloromethanicum	73.8	5e-11
ISMsi4	IS3	IS407	Methylocella silvestris	63.9	5e-08
ISMsi2	IS3	IS407	Methylocella silvestris	63.9	5e-08
ISPye35	IS630		Paracoccus yeei	60	7e-07
ISSpma1	IS3	IS407	Sphingopyxis macrogoltabida	60	7e-07
ISRosp1	IS3	IS3	Roseobacter sp.	60	7e-07
ISAzs37	IS630		Azospirillum sp.	58	3e-06
ISMra5	IS5	IS427	Methylobacterium radiotolerans	58	3e-06
ISSsp4	IS21		Sphingomonas sp.	224	6e-58
ISMex39	IS21		Methylobacterium extorquens	151	7e-36
ISMdi27	IS21		Methylobacterium dichloromethanicum	149	3e-35
ISBdi7	IS21		Bradyrhizobium diazoefficiens	141	7e-33
ISDev1	IS21		Devosia sp.	121	6e-27
ISPa36	IS21		Pseudomonas aeruginosa	119	2e-26
ISPkr1	IS21		Paracoccus koreensis	115	4e-25
ISPa63	IS21		Pseudomonas aeruginosa	109	2e-23
ISPpn1	IS21		Pandoraea pnomenusa	107	9e-23
ISMex27	IS21		Methylobacterium extorquens	105	4e-22
ISRme4	IS21		Cupriavidus metallidurans	105	4e-22
ISPa65	IS21		Pseudomonas aeruginosa	99.6	2e-20
ISAav1	IS21		Acidovorax avenae	99.6	2e-20
ISVasp1	IS21		Variovorax sp.	89.7	2e-17
ISAlde2	IS21		Alicycliphilus denitrificans	89.7	2e-17
ISVapa2	IS21		Variovorax paradoxus	89.7	2e-17
ISMsi1	IS21		Methylocella silvestris	89.7	2e-17
ISPa64	IS21		Pseudomonas aeruginosa	87.7	8e-17
ISCARN16	IS21		Metagenomic data	83.8	1e-15
ISAlde1	IS21		Alicycliphilus denitrificans	81.8	5e-15
ISThsp19	IS21		Thiomonas sp.	81.8	5e-15
ISCsp4	IS21		Comamonas sp	75.8	3e-13
ISAlisp1	IS21		Alicycliphilus sp.	75.8	3e-13
ISAisp6	IS21		Acidovorax sp.	69.9	2e-11
ISCte8	IS21		Comamonas testosteroni	67.9	8e-11
ISCsp3	IS21		Comamonas sp.	65.9	3e-10
ISThsp2	IS21		Thiomonas sp.	65.9	3e-10
ISVapa4	IS21		Variovorax paradoxus	63.9	1e-09
ISThsp10	IS21		Thiomonas sp.	61.9	5e-09
ISAisp7	IS21		Acidovorax sp.	60	2e-08
ISPst3	IS21		Pseudomonas stutzeri	58	8e-08
ISLisp1	IS21		Limnohabitans sp.	54	1e-06
ISJsp3	IS21		Janthinobacterium sp	54	1e-06
ISGdi17	IS21		Gluconacetobacter diazotrophicus	52	5e-06
ISRel16	IS21		Rhizobium etli	73.8	1e-12
ISFK1	IS21		Bradyrhizobium japonicum	61.9	5e-09
ISUnCu3	IS21		Uncultured bacterium	58	7e-08
IS1247	IS1380		Xanthobacter autotrophicus	188	8e-46
ISPye47	IS110	IS1111	Paracoccus yeei	69.9	5e-10
ISMdi12	IS110	IS1111	Methylobacterium dichloromethanicum	67.9	2e-09
ISRpa2	IS3	IS407	Rhodopseudomonas palustris	60	5e-07
ISRel7	IS110	IS1111	Rhizobium etli	58	2e-06
ISMtsp17	IS110	IS1111	Methylobacterium sp.	56	8e-06
Sphingopyxis fribergensis Kp52
ISSpma2	IS256		Sphingopyxis macrogoltabida	2757	0
ISSsp2	IS3	IS150	Sphingomonas sp.	1584	0
ISPko4	IS3	IS150	Paracoccus kondratievae	1409	0
ISSpwi1	IS3	IS407	Sphingomonas wittichii	1205	0
ISKpn12	IS5	IS427	Klebsiella pneumoniae	537	5e-149
ISSpal1	IS481		Sphingopyxis alaskensis	486	2e-133
ISSpma1	IS3	IS407	Sphingopyxis macrogoltabida	420	9e-114
ISSfr1	IS110	IS1111	Sinorhizobium fredii	355	4e-94
ISCc3	IS3	IS150	Caulobacter crescentus	287	8e-74
ISGbe1	IS3	IS407	Granulibacter bethesdensis	285	3e-73
ISSpo7	IS5	IS427	Silicibacter pomeroyi	270	2e-68
IS1031A	IS5	IS1031	Acetobacter xylinum	256	3e-64
ISPze1	IS5	IS427	Paracoccus zeaxanthinifaciens	250	2e-62
ISRtr2	IS3	IS51	Rhizobium tropici	248	7e-62
ISPak1	IS5	IS427	Paracoccus alkenifer	232	4e-57
ISPye24	IS5	IS427	Paracoccus yeei	224	1e-54
ISRhsp4	IS5	IS427	Rhodobacter sphaeroides	212	4e-51
ISGdi1	IS5	IS1031	Gluconacetobacter diazotrophicus	202	4e-48
ISPam4	IS5	IS427	Paracoccus aminophilus	194	9e-46
ISAli7	IS256		Azospirillum lipoferum	186	2e-43
ISAzs23	IS3	IS3	Azospirillum sp.	180	1e-41
ISPaes2	IS5	IS427	Paracoccus aestuarii	176	2e-40
ISHne1	IS3	IS51	Hyphomonas neptunium	174	9e-40
ISPye51	IS5	IS427	Paracoccus yeei	172	3e-39
ISMex37	IS3	IS150	Methylobacterium extorquens	172	3e-39
ISMex16	IS3	IS150	Methylobacterium extorquens	167	2e-37
ISMex14	IS256		Methylobacterium extorquens	157	2e-34
ISDsh1	IS3	IS51	Dinoroseobacter shibae	155	8e-34
ISAzsp1	IS3	IS51	Azotobacter sp.	149	5e-32
ISPye49	IS5	IS427	Paracoccus yeei	147	2e-31
ISAzs17	Tn3		Azospirillum sp.	143	3e-30
ISMno13	IS66		Methylobacterium nodulans	141	1e-29
ISPpa2	IS5	IS427	Paracoccus pantotrophus	141	1e-29
ISMno31	IS3	IS150	Methylobacterium nodulans	139	5e-29
ISAzs24	IS3	IS51	Azospirillum sp.	135	7e-28
ISAli4	IS3	IS51	Azospirillum lipoferum	135	7e-28
ISMch3	IS3	IS150	Methylobacterium chloromethanicum	133	3e-27
ISMex12	IS110		Methylobacterium extorquens	133	3e-27
ISNisp6	IS66		Nitrobacter sp.	133	3e-27
IS1031D	IS5	IS1031	Acetobacter xylinum	127	2e-25
IS1031C	IS5	IS1031	Acetobacter xylinum	127	2e-25
ISMex33	IS3	IS51	Methylobacterium extorquens	123	3e-24
IS868	IS3	IS51	Agrobacterium tumefaciens	115	7e-22
IS1248B	IS5	IS427	Paracoccus denitrificans	115	7e-22
IS1248A	IS5	IS427	Paracoccus denitrificans	115	7e-22
ISEc61	IS5	IS1031	Escherichia coli	109	4e-20
ISXau4	IS66		Xanthobacter autotrophicus	109	4e-20
ISAzca2	IS66		Azorhizobium caulinodans	109	4e-20
ISPa42	Tn3		Pseudomonas aeruginosa	109	4e-20
ISNha4	IS3	IS407	Nitrobacter hamburgensis	107	2e-19
ISPye39	IS5	IS427	Paracoccus yeei	105	7e-19
TnXo19	Tn3		Xanthomonas oryzae	101	1e-17
IS401	IS3	IS51	Burkholderia cepacia	101	1e-17
IS1032	IS5	IS1031	Acetobacter xylinum	101	1e-17
ISGdi3	IS5	IS1031	Gluconacetobacter diazotrophicus	99.6	4e-17
ISUnCu14	IS66		uncultured bacterium	97.6	2e-16
ISPmar2	IS3	IS407	Paracoccus marcusii	97.6	2e-16
ISPye10	IS5	IS1031	Paracoccus yeei	95.6	6e-16
ISPso2	IS5	IS427	Paracoccus solventivorans	91.7	1e-14
ISFpe1	IS66		Fulvimarina pelagi	91.7	1e-14
ISBj9	IS701		Bradyrhizobium japonicum	89.7	4e-14
ISAzs28	IS5	IS1031	Azospirillum sp.	87.7	2e-13
ISBj6_B	IS701		Bradyrhizobium japonicum	87.7	2e-13
ISMno23	IS91		Methylobacterium nodulans	85.7	6e-13
ISAcba1	IS1595	ISSod11	Actinobacteria bacterium	83.8	2e-12
ISPebe1	IS256		Pelagibaca bermudensis	83.8	2e-12
ISRso12	IS3	IS407	Ralstonia solanacearum	83.8	2e-12
ISRme15	IS3	IS51	Ralstonia metallidurans	81.8	1e-11
ISPst4	IS3	IS51	Pseudomonas stutzeri	81.8	1e-11
ISPye52	IS3	IS51	Paracoccus yeei	79.8	4e-11
ISMsi3	IS3	IS407	Methylocella silvestris	79.8	4e-11
ISMno24	IS91		Methylobacterium nodulans	77.8	2e-10
ISApr6	IS66		Alpha proteobacterium	77.8	2e-10
ISMdi16	IS3	IS407	Methylobacterium dichloromethanicum	75.8	6e-10
ISPye36	IS3	IS407	Paracoccus yeei	73.8	2e-09
ISPye6	IS3	IS407	Paracoccus yeei	73.8	2e-09
ISRtr4	IS5	IS1031	Rhizobium tropici	73.8	2e-09
IS51	IS3	IS51	Pseudomonas syringae	73.8	2e-09
ISPye45	IS66		Paracoccus yeei	69.9	4e-08
ISStma17	IS3	IS51	Stenotrophomonas maltophilia	69.9	4e-08
ISRtr3	IS5	IS1031	Rhizobium tropici	69.9	4e-08
ISRtr1	IS256		Rhizobium tropici	69.9	4e-08
ISArsp6	Tn3		Arthrobacter sp.	67.9	1e-07
ISGdi14	IS3	IS51	Gluconacetobacter diazotrophicus	67.9	1e-07
ISNha2	IS701		Nitrobacter hamburgensis	67.9	1e-07
ISAfe7	IS3	IS51	Acidithiobacillus ferrooxidans	63.9	2e-06
ISMca3	IS3	IS51	Methylococcus capsulatus	63.9	2e-06
ISRm4-3	IS5	IS1031	Sinorhizobium meliloti	63.9	2e-06
ISRm4	IS5	IS1031	Rhizobium meliloti	63.9	2e-06
ISTsu1	IS256		Thermaerobacter subterraneus	61.9	9e-06
ISMtsp20	IS5	IS1031	Methylobacterium sp.	61.9	9e-06
ISRce1	ISAs1		Rhodospirillum centenum	61.9	9e-06
ISRm4-1	IS5	IS1031	Rhizobium meliloti	61.9	9e-06
ISRl2	IS5	IS1031	Rhizobium leguminosarum	61.9	9e-06
IS1416	IS3	IS51	Burkholderia glumae	61.9	9e-06
Sphingopyxis granuli NBRC100800
ISAzsp1	IS3	IS51	Azotobacter sp.	172	1e-40
ISHne1	IS3	IS51	Hyphomonas neptunium	159	2e-36
ISAzs24	IS3	IS51	Azospirillum sp.	153	1e-34
ISRtr2	IS3	IS51	Rhizobium tropici	151	5e-34
IS868	IS3	IS51	Agrobacterium tumefaciens	137	7e-30
ISMex33	IS3	IS51	Methylobacterium extorquens	131	4e-28
ISDsh1	IS3	IS51	Dinoroseobacter shibae	119	2e-24
ISAli4	IS3	IS51	Azospirillum lipoferum	117	7e-24
IS51	IS3	IS51	Pseudomonas syringae	89.7	1e-15
ISGdi14	IS3	IS51	Gluconacetobacter diazotrophicus	67.9	5e-09
ISJsp1	IS3	IS51	Janthinobacterium sp.	61.9	3e-07
ISArsp14	ISNCY		Arthrobacter sp.	58	5e-06
ISStma17	IS3	IS51	Stenotrophomonas maltophilia	58	5e-06
ISRme15	IS3	IS51	Ralstonia metallidurans	58	5e-06
ISPko4	IS3	IS150	Paracoccus kondratievae	468	8e-130
ISSsp2	IS3	IS150	Sphingomonas sp.	359	6e-97
ISMex13	IS21		Methylobacterium extorquens	190	3e-46
ISShsp3	IS3	IS3	Sphingomonas sp.	170	3e-40
ISCc3	IS3	IS150	Caulobacter crescentus	165	2e-38
ISMtsp8	IS21		Methylobacterium sp.	131	2e-28
ISAzs30	IS21		Azospirillum sp.	125	1e-26
ISMex37	IS3	IS150	Methylobacterium extorquens	101	2e-19
ISPye46	IS110	IS1111	Paracoccus yeei	93.7	5e-17
ISPko7	IS110	IS1111	Paracoccus kondratievae	89.7	8e-16
ISPye21	IS110	IS1111	Paracoccus yeei	87.7	3e-15
ISPye26	IS110	IS1111	Paracoccus yeei	85.7	1e-14
ISAzba8	IS256		Azospirillum brasilense	85.7	1e-14
ISRle12	IS256		Rhizobium leguminosarum	79.8	8e-13
ISOba2	IS3	IS407	Oceanicola batsensis	79.8	8e-13
ISNGR8	IS256		Rhizobium sp	79.8	8e-13
ISMtsp17	IS110	IS1111	Methylobacterium sp.	77.8	3e-12
ISMch3	IS3	IS150	Methylobacterium chloromethanicum	75.8	1e-11
ISPfe1	IS3	IS407	Paracoccus ferrooxidans	71.9	2e-10
ISRosp2	IS3	IS407	Roseobacter sp.	71.9	2e-10
ISRm10-1	IS630		Sinorhizobium meliloti	69.9	7e-10
ISApr6	IS66		Alpha proteobacterium	67.9	3e-09
ISRel3	IS21		Rhizobium etli	67.9	3e-09
ISMno31	IS3	IS150	Methylobacterium nodulans	65.9	1e-08
ISPye47	IS110	IS1111	Paracoccus yeei	58	3e-06
ISXci1	IS21		Xanthomonas citri	58	3e-06
ISBcen28	IS21		Burkholderia cenocepacia	58	3e-06
ISSm4	ISL3		Serratia marcescens	121	2e-25
ISKpn25	ISL3		Klebsiella pneumoniae	93.7	5e-17
TnXo19	Tn3		Xanthomonas oryzae	85.7	1e-14
TnShfr1	Tn3		Shewanella frigidimarina	60	5e-07
ISLpn9	IS4	IS10	Legionella pneumophila	60	5e-07
ISNwi5	IS481		Nitrobacter winogradskyi	311	7e-83
ISMdi8	IS481		Methylobacterium dichloromethanicum	159	6e-37
ISRel12	IS481		Rhizobium sp.	157	2e-36
ISGdi9	IS481		Gluconacetobacter diazotrophicus	155	1e-35
ISNe2	IS481		Nitrosomonas europaea	103	3e-20
ISMdi4	IS481		Methylobacterium dichloromethanicum	97.6	2e-18
ISMdi11	IS481		Methylobacterium dichloromethanicum	83.8	3e-14
ISSpal1	IS481		Sphingopyxis alaskensis	73.8	3e-11
ISMtsp16	IS481		Methylobacterium sp.	60	4e-07
ISRhba1	IS1595	ISNwi1	Rhodobacterales bacterium	87.7	2e-15
ISMex39	IS21		Methylobacterium extorquens	167	2e-39
ISSsp4	IS21		Sphingomonas sp.	137	2e-30
ISBdi7	IS21		Bradyrhizobium diazoefficiens	133	3e-29
ISMdi27	IS21		Methylobacterium dichloromethanicum	125	6e-27
ISDev1	IS21		Devosia sp.	121	1e-25
ISPkr1	IS21		Paracoccus koreensis	103	2e-20
ISPa63	IS21		Pseudomonas aeruginosa	101	9e-20
ISPa36	IS21		Pseudomonas aeruginosa	95.6	6e-18
ISVapa2	IS21		Variovorax paradoxus	89.7	4e-16
ISRme4	IS21		Cupriavidus metallidurans	89.7	4e-16
ISAav1	IS21		Acidovorax avenae	85.7	6e-15
ISMsi1	IS21		Methylocella silvestris	81.8	9e-14
ISThsp19	IS21		Thiomonas sp.	81.8	9e-14
ISVapa4	IS21		Variovorax paradoxus	79.8	3e-13
ISPpn1	IS21		Pandoraea pnomenusa	79.8	3e-13
ISPa65	IS21		Pseudomonas aeruginosa	75.8	5e-12
ISMex27	IS21		Methylobacterium extorquens	73.8	2e-11
ISCte8	IS21		Comamonas testosteroni	71.9	8e-11
ISCsp4	IS21		Comamonas sp	67.9	1e-09
ISAlisp1	IS21		Alicycliphilus sp.	67.9	1e-09
ISCARN16	IS21		Metagenomic data	67.9	1e-09
ISVasp1	IS21		Variovorax sp.	65.9	5e-09
ISAisp7	IS21		Acidovorax sp.	65.9	5e-09
ISAlde1	IS21		Alicycliphilus denitrificans	65.9	5e-09
IS1600	IS21		Ralstonia eutropha	65.9	5e-09
ISPst3	IS21		Pseudomonas stutzeri	63.9	2e-08
ISAlde2	IS21		Alicycliphilus denitrificans	61.9	8e-08
ISJsp3	IS21		Janthinobacterium sp	61.9	8e-08
ISAisp6	IS21		Acidovorax sp.	61.9	8e-08
ISPa64	IS21		Pseudomonas aeruginosa	60	3e-07
ISCsp3	IS21		Comamonas sp.	58	1e-06
ISSpwi1	IS3	IS407	Sphingomonas wittichii	91.7	8e-17
ISSpma1	IS3	IS407	Sphingopyxis macrogoltabida	81.8	8e-14
ISNwi2	IS1595	ISNwi1	Nitrobacter winogradskyi	60	2e-07
ISLpn9	IS4	IS10	Legionella pneumophila	58	9e-07
ISSpwi1	IS3	IS407	Sphingomonas wittichii	73.8	1e-11
ISVsa3	IS91		Vibrio salmonicida	1937	0
ISAzs17	Tn3		Azospirillum sp.	103	1e-20
TnAs3	Tn3		Aeromonas salmonicida	63.9	1e-08
ISAzs17	Tn3		Azospirillum sp.	107	8e-22
ISLpn9	IS4	IS10	Legionella pneumophila	56	2e-06
ISLpn9	IS4	IS10	Legionella pneumophila	54	8e-06
ISMno24	IS91		Methylobacterium nodulans	91.7	4e-17
ISSpwi1	IS3	IS407	Sphingomonas wittichii	157	5e-37
ISSpma1	IS3	IS407	Sphingopyxis macrogoltabida	65.9	1e-09
ISLpn9	IS4	IS10	Legionella pneumophila	60	6e-08
ISPme1	IS1380		Paracoccus methylutens	3313	0
ISKpn23	IS1380		Klebsiella pneumoniae	1489	0
IS1247	IS1380		Xanthobacter autotrophicus	1362	0
ISApr9	IS1380		Alpha proteobacterium	1225	0
ISApr11	IS1380		Alpha proteobacterium	1142	0
ISOan2	IS1380		Octadecabacter antarcticus	1001	0
ISRssp9	IS1380		Roseovarius sp.	218	4e-56
ISSpo2	IS1380		Silicibacter pomeroyi	93.7	2e-18
ISApr8	IS1380		Alpha proteobacterium	79.8	2e-14
ISMno24	IS91		Methylobacterium nodulans	71.9	5e-12
ISMno23	IS91		Methylobacterium nodulans	71.9	5e-12
ISTha3	IS91		Thauera sp.	52	4e-06
ISSpwi1	IS3	IS407	Sphingomonas wittichii	1291	0
ISSpma1	IS3	IS407	Sphingopyxis macrogoltabida	347	2e-95
ISGbe1	IS3	IS407	Granulibacter bethesdensis	319	5e-87
ISPmar2	IS3	IS407	Paracoccus marcusii	113	5e-25
ISPye36	IS3	IS407	Paracoccus yeei	95.6	1e-19
ISNha4	IS3	IS407	Nitrobacter hamburgensis	89.7	8e-18
ISPye6	IS3	IS407	Paracoccus yeei	73.8	4e-13
ISMdi16	IS3	IS407	Methylobacterium dichloromethanicum	67.9	3e-11
ISRosp5	IS3	IS407	Roseobacter sp.	60	7e-09
ISMex5	IS3	IS407	Methylobacterium extorquens	60	7e-09
ISNGR9	IS5	IS427	Rhizobium sp	52	8e-07
Sphingopyxis indica DS15
ISEc61	IS5	IS1031	Escherichia coli	60	2e-08
ISEc61	IS5	IS1031	Escherichia coli	105	6e-22
ISEc61	IS5	IS1031	Escherichia coli	105	4e-22
ISEc61	IS5	IS1031	Escherichia coli	105	5e-21
ISLpn9	IS4	IS10	Legionella pneumophila	56	4e-06
ISSpma1	IS3	IS407	Sphingopyxis macrogoltabida	571	2e-160
ISPa42	Tn3		Pseudomonas aeruginosa	167	9e-39
ISGbe1	IS3	IS407	Granulibacter bethesdensis	119	2e-24
ISEc61	IS5	IS1031	Escherichia coli	103	1e-19
TnAs2	Tn3		Aeromonas salmonicida	69.9	2e-09
ISStma11	ISL3		Stenotrophomonas maltophilia	65.9	2e-08
ISNha4	IS3	IS407	Nitrobacter hamburgensis	63.9	9e-08
TnAs3	Tn3		Aeromonas salmonicida	61.9	4e-07
ISSpal1	IS481		Sphingopyxis alaskensis	555	1e-155
ISMtsp8	IS21		Methylobacterium sp.	133	1e-28
ISAzs30	IS21		Azospirillum sp.	129	2e-27
ISMex13	IS21		Methylobacterium extorquens	127	8e-27
ISRel3	IS21		Rhizobium etli	125	3e-26
ISEc61	IS5	IS1031	Escherichia coli	103	1e-19
ISAzs37	IS630		Azospirillum sp.	93.7	1e-16
ISPye35	IS630		Paracoccus yeei	91.7	4e-16
ISSpwi1	IS3	IS407	Sphingomonas wittichii	81.8	4e-13
ISBcen28	IS21		Burkholderia cenocepacia	79.8	2e-12
ISMex41	IS630		Methylobacterium extorquens	75.8	2e-11
ISSpo6	IS630		Silicibacter pomeroyi	71.9	4e-10
ISBcen14	IS66		Burkholderia cenocepacia	71.9	4e-10
ISAli10	IS66		Azospirillum lipoferum	61.9	4e-07
ISMdi4	IS481		Methylobacterium dichloromethanicum	60	1e-06
IS66	IS66		Agrobacterium tumefaciens	58	6e-06
ISLpn9	IS4	IS10	Legionella pneumophila	58	7e-06
ISEc61	IS5	IS1031	Escherichia coli	105	3e-20
ISEc61	IS5	IS1031	Escherichia coli	61.9	3e-07
ISEc61	IS5	IS1031	Escherichia coli	105	1e-21
TnXo19	Tn3		Xanthomonas oryzae	95.6	1e-18
ISLpn9	IS4	IS10	Legionella pneumophila	63.9	1e-07
ISMex39	IS21		Methylobacterium extorquens	167	7e-39
ISSsp4	IS21		Sphingomonas sp.	137	6e-30
ISBdi7	IS21		Bradyrhizobium diazoefficiens	135	2e-29
ISMdi27	IS21		Methylobacterium dichloromethanicum	125	2e-26
ISDev1	IS21		Devosia sp.	121	4e-25
ISPkr1	IS21		Paracoccus koreensis	103	8e-20
ISPa63	IS21		Pseudomonas aeruginosa	101	3e-19
ISPa36	IS21		Pseudomonas aeruginosa	95.6	2e-17
ISVapa2	IS21		Variovorax paradoxus	89.7	1e-15
ISRme4	IS21		Cupriavidus metallidurans	89.7	1e-15
ISAav1	IS21		Acidovorax avenae	85.7	2e-14
ISThsp19	IS21		Thiomonas sp.	83.8	8e-14
ISMsi1	IS21		Methylocella silvestris	81.8	3e-13
ISVapa4	IS21		Variovorax paradoxus	79.8	1e-12
ISPpn1	IS21		Pandoraea pnomenusa	79.8	1e-12
ISMno24	IS91		Methylobacterium nodulans	77.8	5e-12
ISPa65	IS21		Pseudomonas aeruginosa	75.8	2e-11
ISMex27	IS21		Methylobacterium extorquens	73.8	7e-11
ISAzo26	IS91		Azoarcus sp.	73.8	7e-11
ISCte8	IS21		Comamonas testosteroni	71.9	3e-10
ISTha3	IS91		Thauera sp.	69.9	1e-09
ISCsp4	IS21		Comamonas sp	67.9	5e-09
ISAlisp1	IS21		Alicycliphilus sp.	67.9	5e-09
ISCARN16	IS21		Metagenomic data	67.9	5e-09
ISVasp1	IS21		Variovorax sp.	65.9	2e-08
ISAisp7	IS21		Acidovorax sp.	65.9	2e-08
ISAlde1	IS21		Alicycliphilus denitrificans	65.9	2e-08
IS1600	IS21		Ralstonia eutropha	65.9	2e-08
ISPst3	IS21		Pseudomonas stutzeri	63.9	7e-08
ISAlde2	IS21		Alicycliphilus denitrificans	61.9	3e-07
ISJsp3	IS21		Janthinobacterium sp	61.9	3e-07
ISAisp6	IS21		Acidovorax sp.	61.9	3e-07
ISPa64	IS21		Pseudomonas aeruginosa	60	1e-06
ISCsp3	IS21		Comamonas sp.	58	4e-06
ISEc61	IS5	IS1031	Escherichia coli	105	2e-20
TnXo19	Tn3		Xanthomonas oryzae	117	4e-24
ISAzs17	Tn3		Azospirillum sp.	95.6	1e-17
ISEc61	IS5	IS1031	Escherichia coli	60	8e-07
ISMex12	IS110		Methylobacterium extorquens	99.6	3e-18
ISEc61	IS5	IS1031	Escherichia coli	60	3e-06
IS6100	IS6		Mycobacterium fortuitum	1633	0
ISEli1	IS3	IS407	Erythrobacter litoralis	424	1e-115
ISOgr1	IS3	IS51	Oceanicola granulosus	291	1e-75
ISXau3	IS3	IS51	Xanthobacter autotrophicus	198	1e-47
ISSst1	IS3	IS407	Sagittula stellata	127	3e-26
ISSpma3	IS3	IS407	Sphingopyxis macrogoltabida	115	1e-22
ISSisp1	IS3	IS407	Silicibacter sp.	99.6	8e-18
ISEc61	IS5	IS1031	Escherichia coli	95.6	1e-16
ISSusp1	IS3	IS51	Sulfitobacter sp.	93.7	5e-16
ISRle5	IS3	IS407	Rhizobium leguminosarum	79.8	7e-12
ISXac3	IS3	IS51	Xanthomonas axonopodis	73.8	4e-10
ISStag1	IS6		Stappia aggregata	71.9	2e-09
ISPen2	IS3	IS51	Pseudomonas entomophila	69.9	7e-09
ISAisp2	IS3	IS51	Acidovorax sp.	69.9	7e-09
ISR1	IS3	IS407	Rhizobium lupini	67.9	3e-08
ISPsy29	IS3	IS51	Pseudomonas syringae	63.9	4e-07
ISAcr2	IS6		Acidiphilium cryptum	61.9	2e-06
ISAs7	IS3	IS51	Aeromonas salmonicida	60	7e-06
ISAs5	IS3	IS51	Aeromonas salmonicida	60	7e-06
ISEli1	IS3	IS407	Erythrobacter litoralis	1047	0
ISSsp2	IS3	IS150	Sphingomonas sp.	555	3e-156
ISSpma3	IS3	IS407	Sphingopyxis macrogoltabida	438	5e-121
ISPko4	IS3	IS150	Paracoccus kondratievae	371	9e-101
IS511	IS3	IS407	Caulobacter crescentus	117	2e-24
ISEc61	IS5	IS1031	Escherichia coli	105	8e-21
ISCc3	IS3	IS150	Caulobacter crescentus	103	3e-20
ISPye34	IS3	IS407	Paracoccus yeei	97.6	2e-18
ISPye57	IS3	IS407	Paracoccus yeei	91.7	1e-16
ISMamg2	IS3	IS407	Magnetospirillum magneticum	91.7	1e-16
ISMch3	IS3	IS150	Methylobacterium chloromethanicum	89.7	5e-16
ISMex37	IS3	IS150	Methylobacterium extorquens	89.7	5e-16
ISMno31	IS3	IS150	Methylobacterium nodulans	87.7	2e-15
ISOba1	IS3	IS407	Oceanicola batsensis	87.7	2e-15
ISMamg1	IS3	IS407	Magnetospirillum magneticum	85.7	8e-15
ISAtu5	IS3	IS407	Agrobacterium tumefaciens	79.8	5e-13
ISXau1	IS3	IS407	Xanthobacter autotrophicus	73.8	3e-11
ISSme1	IS3	IS407	Sinorhizobium medicae	69.9	5e-10
ISRpa2	IS3	IS407	Rhodopseudomonas palustris	69.9	5e-10
ISRm6	IS3	IS407	Rhizobium meliloti	69.9	5e-10
ISMex16	IS3	IS150	Methylobacterium extorquens	67.9	2e-09
ISMex1	IS3	IS407	Methylobacterium extorquens	60	4e-07
ISEc61	IS5	IS1031	Escherichia coli	105	5e-21
ISEc61	IS5	IS1031	Escherichia coli	105	8e-21
Sphingopyxis macrogoltabida 203N
ISSpma2	IS256		Sphingopyxis macrogoltabida	2789	0
ISSpma1	IS3	IS407	Sphingopyxis macrogoltabida	2527	0
ISSpma3	IS3	IS407	Sphingopyxis macrogoltabida	2508	0
ISSsp2	IS3	IS150	Sphingomonas sp.	1574	0
ISPko4	IS3	IS150	Paracoccus kondratievae	1481	0
ISSpwi1	IS3	IS407	Sphingomonas wittichii	1205	0
ISGbe1	IS3	IS407	Granulibacter bethesdensis	704	0
ISEli1	IS3	IS407	Erythrobacter litoralis	654	0
ISSfr1	IS110	IS1111	Sinorhizobium fredii	355	5e-94
ISAzs17	Tn3		Azospirillum sp.	276	3e-70
ISSpal1	IS481		Sphingopyxis alaskensis	266	3e-67
ISMex37	IS3	IS150	Methylobacterium extorquens	230	2e-56
ISCc3	IS3	IS150	Caulobacter crescentus	214	1e-51
ISAli7	IS256		Azospirillum lipoferum	194	1e-45
ISMch3	IS3	IS150	Methylobacterium chloromethanicum	163	4e-36
ISMex14	IS256		Methylobacterium extorquens	163	4e-36
ISNisp6	IS66		Nitrobacter sp.	161	1e-35
ISMno31	IS3	IS150	Methylobacterium nodulans	159	6e-35
ISMex16	IS3	IS150	Methylobacterium extorquens	153	3e-33
ISKpn12	IS5	IS427	Klebsiella pneumoniae	141	1e-29
ISPak1	IS5	IS427	Paracoccus alkenifer	137	2e-28
ISMex12	IS110		Methylobacterium extorquens	133	3e-27
TnXo19	Tn3		Xanthomonas oryzae	129	5e-26
ISPye24	IS5	IS427	Paracoccus yeei	127	2e-25
ISXau4	IS66		Xanthobacter autotrophicus	127	2e-25
ISRhsp4	IS5	IS427	Rhodobacter sphaeroides	125	8e-25
ISPam4	IS5	IS427	Paracoccus aminophilus	119	5e-23
ISPa42	Tn3		Pseudomonas aeruginosa	119	5e-23
IS511	IS3	IS407	Caulobacter crescentus	117	2e-22
ISRtr2	IS3	IS51	Rhizobium tropici	115	7e-22
ISAzca2	IS66		Azorhizobium caulinodans	111	1e-20
ISRhru5	IS5	IS427	Rhodospirillum rubrum	109	5e-20
ISMex5	IS3	IS407	Methylobacterium extorquens	109	5e-20
ISPpa2	IS5	IS427	Paracoccus pantotrophus	109	5e-20
ISNha4	IS3	IS407	Nitrobacter hamburgensis	107	2e-19
ISRle4	IS3	IS407	Rhizobium leguminosarum	107	2e-19
ISPye49	IS5	IS427	Paracoccus yeei	105	7e-19
ISSme1	IS3	IS407	Sinorhizobium medicae	105	7e-19
ISRm6	IS3	IS407	Rhizobium meliloti	105	7e-19
ISAli10	IS66		Azospirillum lipoferum	103	3e-18
ISRel24	IS66		Rhizobium etli	99.6	4e-17
ISFpe1	IS66		Fulvimarina pelagi	99.6	4e-17
IS66	IS66		Agrobacterium tumefaciens	99.6	4e-17
ISPmar2	IS3	IS407	Paracoccus marcusii	97.6	2e-16
ISSusp1	IS3	IS51	Sulfitobacter sp.	95.6	7e-16
IS1248B	IS5	IS427	Paracoccus denitrificans	95.6	7e-16
IS1248A	IS5	IS427	Paracoccus denitrificans	95.6	7e-16
ISPye57	IS3	IS407	Paracoccus yeei	93.7	3e-15
ISMamg2	IS3	IS407	Magnetospirillum magneticum	93.7	3e-15
ISMno13	IS66		Methylobacterium nodulans	93.7	3e-15
ISR1	IS3	IS407	Rhizobium lupini	91.7	1e-14
ISPso2	IS5	IS427	Paracoccus solventivorans	89.7	4e-14
ISPze1	IS5	IS427	Paracoccus zeaxanthinifaciens	89.7	4e-14
ISApr6	IS66		Alpha proteobacterium	89.7	4e-14
ISMdi16	IS3	IS407	Methylobacterium dichloromethanicum	87.7	2e-13
ISXau1	IS3	IS407	Xanthobacter autotrophicus	87.7	2e-13
ISAcba1	IS1595	ISSod11	Actinobacteria bacterium	83.8	3e-12
ISPebe1	IS256		Pelagibaca bermudensis	83.8	3e-12
ISAtu5	IS3	IS407	Agrobacterium tumefaciens	83.8	3e-12
ISOba1	IS3	IS407	Oceanicola batsensis	83.8	3e-12
ISRso12	IS3	IS407	Ralstonia solanacearum	83.8	3e-12
ISPye6	IS3	IS407	Paracoccus yeei	81.8	1e-11
ISPaes2	IS5	IS427	Paracoccus aestuarii	81.8	1e-11
ISHne1	IS3	IS51	Hyphomonas neptunium	81.8	1e-11
ISPye34	IS3	IS407	Paracoccus yeei	79.8	4e-11
ISMsi4	IS3	IS407	Methylocella silvestris	79.8	4e-11
ISMsi3	IS3	IS407	Methylocella silvestris	79.8	4e-11
ISMsi2	IS3	IS407	Methylocella silvestris	79.8	4e-11
ISMamg1	IS3	IS407	Magnetospirillum magneticum	79.8	4e-11
ISRpa2	IS3	IS407	Rhodopseudomonas palustris	77.8	2e-10
ISPye36	IS3	IS407	Paracoccus yeei	73.8	3e-09
ISMex33	IS3	IS51	Methylobacterium extorquens	73.8	3e-09
ISHne6	IS6		Hyphomonas neptunium	71.9	1e-08
ISPa40	Tn3		Pseudomonas aeruginosa	71.9	1e-08
ISMex1	IS3	IS407	Methylobacterium extorquens	71.9	1e-08
ISBj6_B	IS701		Bradyrhizobium japonicum	71.9	1e-08
ISPye51	IS5	IS427	Paracoccus yeei	69.9	4e-08
ISRtr1	IS256		Rhizobium tropici	69.9	4e-08
ISAzs20	IS66		Azospirillum sp.	67.9	2e-07
ISNha2	IS701		Nitrobacter hamburgensis	67.9	2e-07
ISPye44	IS66		Paracoccus yeei	65.9	6e-07
ISSpo7	IS5	IS427	Silicibacter pomeroyi	65.9	6e-07
ISAzs24	IS3	IS51	Azospirillum sp.	63.9	2e-06
ISUnCu14	IS66		uncultured bacterium	63.9	2e-06
ISGdi11	IS3	IS407	Gluconacetobacter diazotrophicus	63.9	2e-06
ISRssp1	IS3	IS407	Roseovarius sp.	63.9	2e-06
ISAzsp1	IS3	IS51	Azotobacter sp.	63.9	2e-06
ISTsu1	IS256		Thermaerobacter subterraneus	61.9	1e-05
ISBj9	IS701		Bradyrhizobium japonicum	61.9	1e-05
ISRosp5	IS3	IS407	Roseobacter sp.	61.9	1e-05
ISRce1	ISAs1		Rhodospirillum centenum	61.9	1e-05
ISCARN86	IS3	IS407	Metagenomic data	61.9	1e-05
ISAli12B	IS5	IS427	Azospirillum lipoferum	61.9	1e-05
ISAli12A	IS5	IS427	Azospirillum lipoferum	61.9	1e-05
ISRm7	IS3	IS407	Rhizobium meliloti	61.9	1e-05
Sphingopyxis sp. 113P3
ISSsp2	IS3	IS150	Sphingomonas sp.	1703	0
ISPko4	IS3	IS150	Paracoccus kondratievae	1584	0
ISPye4	IS1182		Paracoccus yeei	918	0
ISSp1	IS1380		Sphingomonas paucimobilis	644	0
ISKpn12	IS5	IS427	Klebsiella pneumoniae	585	2e-163
IS1412	IS1380		Sphingomonas sp.	583	9e-163
ISGdi14	IS3	IS51	Gluconacetobacter diazotrophicus	555	2e-154
ISPve1	IS21		Paracoccus versutus	527	5e-146
ISMch1	IS3	IS150	Methylobacterium chloromethanicum	464	6e-127
ISRm1	IS3	IS2	Rhizobium meliloti	414	5e-112
ISPak1	IS5	IS427	Paracoccus alkenifer	285	3e-73
ISSsp5	IS21		Sphingomonas sp.	268	7e-68
ISMex37	IS3	IS150	Methylobacterium extorquens	260	2e-65
ISCc3	IS3	IS150	Caulobacter crescentus	252	4e-63
ISMch3	IS3	IS150	Methylobacterium chloromethanicum	250	2e-62
ISPze1	IS5	IS427	Paracoccus zeaxanthinifaciens	238	6e-59
IS1312	IS3	IS2	Agrobacterium tumefaciens	236	2e-58
ISRhsp4	IS5	IS427	Rhodobacter sphaeroides	230	2e-56
ISSpo7	IS5	IS427	Silicibacter pomeroyi	226	2e-55
ISPye24	IS5	IS427	Paracoccus yeei	222	4e-54
ISAli6	IS256		Azospirillum lipoferum	212	4e-51
ISMno31	IS3	IS150	Methylobacterium nodulans	200	1e-47
ISRhru4	IS256		Rhodospirillum rubrum	192	3e-45
ISPaes2	IS5	IS427	Paracoccus aestuarii	190	1e-44
ISPam4	IS5	IS427	Paracoccus aminophilus	186	2e-43
ISPye51	IS5	IS427	Paracoccus yeei	184	8e-43
ISSsp4	IS21		Sphingomonas sp.	184	8e-43
ISDev1	IS21		Devosia sp.	170	1e-38
ISPye49	IS5	IS427	Paracoccus yeei	168	5e-38
ISMex16	IS3	IS150	Methylobacterium extorquens	165	7e-37
ISMex39	IS21		Methylobacterium extorquens	157	2e-34
ISRle11	IS1182		Rhizobium leguminosarum	153	3e-33
ISBmu7	IS21		Burkholderia multivorans	149	4e-32
ISSpwi1	IS3	IS407	Sphingomonas wittichii	145	7e-31
ISMtsp13	IS256		Methylobacterium sp.	143	3e-30
ISMdi5	IS3	IS3	Methylobacterium dichloromethanicum	139	4e-29
ISPpa5	IS66		Paracoccus pantotrophus	125	6e-25
ISPebe1	IS256		Pelagibaca bermudensis	123	3e-24
ISPa36	IS21		Pseudomonas aeruginosa	123	3e-24
ISMex12	IS110		Methylobacterium extorquens	123	3e-24
ISBdi7	IS21		Bradyrhizobium diazoefficiens	119	4e-23
ISStag2	IS481		Stappia aggregata	119	4e-23
ISRtr1	IS256		Rhizobium tropici	119	4e-23
ISMpo9	IS701		Methylobacterium populi	115	6e-22
ISMtsp8	IS21		Methylobacterium sp.	115	6e-22
TnXo19	Tn3		Xanthomonas oryzae	111	1e-20
ISMno14	IS110	IS1111	Methylobacterium nodulans	111	1e-20
ISPye47	IS110	IS1111	Paracoccus yeei	109	4e-20
ISAzs11	ISAs1		Azospirillum sp.	109	4e-20
ISAzs17	Tn3		Azospirillum sp.	107	1e-19
IS1248B	IS5	IS427	Paracoccus denitrificans	107	1e-19
IS1248A	IS5	IS427	Paracoccus denitrificans	107	1e-19
ISMno22	IS110	IS1111	Methylobacterium nodulans	103	2e-18
ISMdi27	IS21		Methylobacterium dichloromethanicum	103	2e-18
ISMex13	IS21		Methylobacterium extorquens	103	2e-18
ISPpa2	IS5	IS427	Paracoccus pantotrophus	103	2e-18
ISPkr1	IS21		Paracoccus koreensis	101	9e-18
IS869	IS5	IS427	Agrobacterium tumefaciens	101	9e-18
ISBj11	IS21		Bradyrhizobium japonicum	99.6	4e-17
ISRme4	IS21		Cupriavidus metallidurans	99.6	4e-17
ISRel5	IS21		Rhizobium etli	97.6	1e-16
ISAzs30	IS21		Azospirillum sp.	95.6	6e-16
ISMpo7	IS5	IS427	Methylobacterium populi	95.6	6e-16
ISPa65	IS21		Pseudomonas aeruginosa	91.7	9e-15
ISAlisp1	IS21		Alicycliphilus sp.	91.7	9e-15
ISPa63	IS21		Pseudomonas aeruginosa	91.7	9e-15
ISAzs33	IS3	IS150	Azospirillum sp.	91.7	9e-15
ISAzsp1	IS3	IS51	Azotobacter sp.	91.7	9e-15
ISBugl1	IS3	IS2	Burkholderia glumae	91.7	9e-15
ISAav1	IS21		Acidovorax avenae	91.7	9e-15
ISMpo3	IS1380		Methylobacterium populi	89.7	4e-14
ISRsp3	IS21		Rhizobium sp.	89.7	4e-14
ISBdi3	ISL3		Bradyrhizobium diazoefficiens	87.7	1e-13
ISPye3	IS3	IS150	Paracoccus yeei	87.7	1e-13
ISVapa2	IS21		Variovorax paradoxus	87.7	1e-13
ISMno24	IS91		Methylobacterium nodulans	87.7	1e-13
ISAzs24	IS3	IS51	Azospirillum sp.	87.7	1e-13
ISMex2	IS481		Methylobacterium extorquens	87.7	1e-13
ISAli5	IS3	IS150	Azospirillum lipoferum	87.7	1e-13
ISPye46	IS110	IS1111	Paracoccus yeei	85.7	5e-13
ISRce2	IS1182		Rhodospirillum centenum	85.7	5e-13
ISRhru5	IS5	IS427	Rhodospirillum rubrum	85.7	5e-13
ISMno32	IS1182		Methylobacterium nodulans	85.7	5e-13
ISMno17	IS1182		Methylobacterium nodulans	85.7	5e-13
ISRel3	IS21		Rhizobium etli	85.7	5e-13
ISNha1	IS701		Nitrobacter hamburgensis	85.7	5e-13
ISPa42	Tn3		Pseudomonas aeruginosa	85.7	5e-13
IS1417	IS3	IS2	Burkholderia glumae	85.7	5e-13
ISPye26	IS110	IS1111	Paracoccus yeei	83.8	2e-12
ISPye35	IS630		Paracoccus yeei	83.8	2e-12
ISPye21	IS110	IS1111	Paracoccus yeei	83.8	2e-12
ISThsp19	IS21		Thiomonas sp.	83.8	2e-12
ISAzs32	IS110	IS1111	Azospirillum sp.	81.8	9e-12
ISMsi1	IS21		Methylocella silvestris	81.8	9e-12
ISMex41	IS630		Methylobacterium extorquens	81.8	9e-12
ISRel2	IS481		Rhizobium etli	81.8	9e-12
ISDsh1	IS3	IS51	Dinoroseobacter shibae	81.8	9e-12
ISRso10	IS3	IS2	Ralstonia solanacearum	81.8	9e-12
ISBdo1	IS1182		Burkholderia dolosa	79.8	3e-11
ISAli4	IS3	IS51	Azospirillum lipoferum	77.8	1e-10
ISRtr2	IS3	IS51	Rhizobium tropici	77.8	1e-10
ISBm3	IS481		Brucella melitensis	77.8	1e-10
ISAcba1	IS1595	ISSod11	Actinobacteria bacterium	75.8	5e-10
ISBj9	IS701		Bradyrhizobium japonicum	75.8	5e-10
ISMex27	IS21		Methylobacterium extorquens	75.8	5e-10
ISHne1	IS3	IS51	Hyphomonas neptunium	75.8	5e-10
ISGxy1	IS3	IS150	Gluconacetobacter xylinus	73.8	2e-09
ISSco1	IS481		Streptomyces coelicolor	73.8	2e-09
IS868	IS3	IS51	Agrobacterium tumefaciens	73.8	2e-09
IS1652	IS481		Streptomyces coelicolor	73.8	2e-09
IS1649	IS481		Streptomyces coelicolor	73.8	2e-09
ISRel16	IS21		Rhizobium etli	71.9	8e-09
ISPso1	IS256		Paracoccus solventivorans	71.9	8e-09
ISCARN16	IS21		Metagenomic data	71.9	8e-09
ISPst3	IS21		Pseudomonas stutzeri	71.9	8e-09
ISPosp6	IS481		Polaromonas sp.	71.9	8e-09
ISAisp6	IS21		Acidovorax sp.	69.9	3e-08
ISMex8	IS21		Methylobacterium extorquens	69.9	3e-08
ISPa56	IS3	IS2	Pseudomonas aeruginosa	67.9	1e-07
ISAzs6	IS701		Azospirillum sp.	67.9	1e-07
ISAcp2	IS481		Acidobacterium capsulatum	67.9	1e-07
ISMtsp17	IS110	IS1111	Methylobacterium sp.	67.9	1e-07
ISNha3	IS1380		Nitrobacter hamburgensis	67.9	1e-07
ISUnCu3	IS21		Uncultured bacterium	67.9	1e-07
ISButh2	IS3	IS2	Burkholderia thailandensis	67.9	1e-07
ISBj6_B	IS701		Bradyrhizobium japonicum	67.9	1e-07
ISVapa4	IS21		Variovorax paradoxus	65.9	5e-07
ISFK1	IS21		Bradyrhizobium japonicum	65.9	5e-07
ISMra5	IS5	IS427	Methylobacterium radiotolerans	65.9	5e-07
ISMesp2	IS1380		Mesorhizobium sp.	65.9	5e-07
ISStma12	IS481		Stenotrophomonas maltophilia	65.9	5e-07
ISBcen28	IS21		Burkholderia cenocepacia	65.9	5e-07
ISAzs2	IS21		Azospirillum sp.	63.9	2e-06
ISMno23	IS91		Methylobacterium nodulans	63.9	2e-06
ISBfun3	IS1182		Burkholderia fungorum	63.9	2e-06
ISThsp11	IS3	IS3	Thiomonas sp.	63.9	2e-06
ISSpo6	IS630		Silicibacter pomeroyi	63.9	2e-06
ISCc4	IS110	IS1111	Caulobacter crescentus	63.9	2e-06
IS51	IS3	IS51	Pseudomonas syringae	63.9	2e-06
ISSpma2	IS256		Sphingopyxis macrogoltabida	61.9	8e-06
ISCARN61	IS256		Metagenomic data	61.9	8e-06
ISThsp9	Tn3		Thiomonas sp.	61.9	8e-06
ISStpr1	IS481		Streptomyces pristinaespiralis	61.9	8e-06
ISPme1	IS1380		Paracoccus methylutens	3313	0
ISSsp2	IS3	IS150	Sphingomonas sp.	1709	0
ISPko4	IS3	IS150	Paracoccus kondratievae	1582	0
ISKpn23	IS1380		Klebsiella pneumoniae	1489	0
IS1247	IS1380		Xanthobacter autotrophicus	1364	0
ISApr9	IS1380		Alpha proteobacterium	1225	0
ISApr11	IS1380		Alpha proteobacterium	1142	0
ISOan2	IS1380		Octadecabacter antarcticus	1001	0
ISEli1	IS3	IS407	Erythrobacter litoralis	646	0
ISSpma3	IS3	IS407	Sphingopyxis macrogoltabida	498	2e-138
ISEc61	IS5	IS1031	Escherichia coli	297	4e-78
ISMex37	IS3	IS150	Methylobacterium extorquens	260	9e-67
ISCc3	IS3	IS150	Caulobacter crescentus	252	2e-64
ISMch3	IS3	IS150	Methylobacterium chloromethanicum	250	9e-64
ISRssp9	IS1380		Roseovarius sp.	218	3e-54
ISMno31	IS3	IS150	Methylobacterium nodulans	200	7e-49
ISAzs28	IS5	IS1031	Azospirillum sp.	194	5e-47
ISMex16	IS3	IS150	Methylobacterium extorquens	165	4e-38
ISMamg2	IS3	IS407	Magnetospirillum magneticum	135	4e-29
ISMex12	IS110		Methylobacterium extorquens	129	2e-27
ISOba1	IS3	IS407	Oceanicola batsensis	119	2e-24
IS511	IS3	IS407	Caulobacter crescentus	117	9e-24
Tn5403	Tn3		Klebsiella pneumoniae	105	3e-20
ISXau1	IS3	IS407	Xanthobacter autotrophicus	101	5e-19
ISPye34	IS3	IS407	Paracoccus yeei	97.6	8e-18
ISPye57	IS3	IS407	Paracoccus yeei	93.7	1e-16
TnXo19	Tn3		Xanthomonas oryzae	93.7	1e-16
ISSpo2	IS1380		Silicibacter pomeroyi	93.7	1e-16
ISMex38	Tn3		Methylobacterium extorquens	91.7	5e-16
ISRm4-1	IS5	IS1031	Rhizobium meliloti	89.7	2e-15
ISR1	IS3	IS407	Rhizobium lupini	87.7	8e-15
ISAtu5	IS3	IS407	Agrobacterium tumefaciens	85.7	3e-14
ISRpa2	IS3	IS407	Rhodopseudomonas palustris	85.7	3e-14
ISMamg1	IS3	IS407	Magnetospirillum magneticum	85.7	3e-14
ISSme1	IS3	IS407	Sinorhizobium medicae	81.8	5e-13
ISRm6	IS3	IS407	Rhizobium meliloti	81.8	5e-13
ISRsp12	Tn3		Rhizhobium sp.	79.8	2e-12
ISAzs17	Tn3		Azospirillum sp.	79.8	2e-12
ISApr8	IS1380		Alpha proteobacterium	79.8	2e-12
ISPfe1	IS3	IS407	Paracoccus ferrooxidans	75.8	3e-11
ISGdi11	IS3	IS407	Gluconacetobacter diazotrophicus	75.8	3e-11
ISOba2	IS3	IS407	Oceanicola batsensis	73.8	1e-10
IS1031C	IS5	IS1031	Acetobacter xylinum	73.8	1e-10
ISRtr4	IS5	IS1031	Rhizobium tropici	71.9	5e-10
IS1031D	IS5	IS1031	Acetobacter xylinum	71.9	5e-10
ISRtr3	IS5	IS1031	Rhizobium tropici	69.9	2e-09
ISAli20	Tn3		Azospirillum lipoferum	67.9	7e-09
ISRde2	IS3	IS407	Roseobacter denitrificans	67.9	7e-09
ISMex1	IS3	IS407	Methylobacterium extorquens	65.9	3e-08
ISGdi1	IS5	IS1031	Gluconacetobacter diazotrophicus	63.9	1e-07
IS1031A	IS5	IS1031	Acetobacter xylinum	63.9	1e-07
ISXca1	IS3	IS407	Xanthomonas campestris	60	2e-06
ISDsh2	IS3	IS407	Dinoroseobacter shibae	60	2e-06
ISRle4	IS3	IS407	Rhizobium leguminosarum	58	7e-06
ISRm15	IS5	IS1031	Sinorhizobium meliloti	58	7e-06
Sphingopyxis sp. C-1
ISEli1	IS3	IS407	Erythrobacter litoralis	656	0
ISEc61	IS5	IS1031	Escherichia coli	412	1e-111
ISSpma3	IS3	IS407	Sphingopyxis macrogoltabida	383	1e-102
ISAzs28	IS5	IS1031	Azospirillum sp.	234	7e-58
ISRel7	IS110	IS1111	Rhizobium etli	105	4e-19
IS511	IS3	IS407	Caulobacter crescentus	97.6	1e-16
ISMamg2	IS3	IS407	Magnetospirillum magneticum	87.7	1e-13
ISSme1	IS3	IS407	Sinorhizobium medicae	87.7	1e-13
ISRm6	IS3	IS407	Rhizobium meliloti	87.7	1e-13
ISOba1	IS3	IS407	Oceanicola batsensis	81.8	6e-12
ISPye57	IS3	IS407	Paracoccus yeei	77.8	1e-10
ISAtu5	IS3	IS407	Agrobacterium tumefaciens	77.8	1e-10
ISDar1	IS110	IS1111	Dechloromonas aromatica	75.8	4e-10
ISMlo2	IS110	IS1111	Mesorhizobium loti	75.8	4e-10
ISAzs4	IS110	IS1111	Azospirillum sp.	73.8	1e-09
ISMamg1	IS3	IS407	Magnetospirillum magneticum	73.8	1e-09
ISPko7	IS110	IS1111	Paracoccus kondratievae	71.9	6e-09
ISMlo1	IS110	IS1111	Mesorhizobium loti	71.9	6e-09
ISCc4	IS110	IS1111	Caulobacter crescentus	69.9	2e-08
ISPye34	IS3	IS407	Paracoccus yeei	65.9	4e-07
ISMex29	IS110	IS1111	Methylobacterium dichloromethanicum	65.9	4e-07
ISGdi3	IS5	IS1031	Gluconacetobacter diazotrophicus	65.9	4e-07
ISRpa2	IS3	IS407	Rhodopseudomonas palustris	65.9	4e-07
TnXo19	Tn3		Xanthomonas oryzae	61.9	6e-06
ISSpwi1	IS3	IS407	Sphingomonas wittichii	208	2e-50
ISMex39	IS21		Methylobacterium extorquens	159	1e-35
ISBdi7	IS21		Bradyrhizobium diazoefficiens	135	2e-28
ISMdi27	IS21		Methylobacterium dichloromethanicum	133	8e-28
ISSsp4	IS21		Sphingomonas sp.	121	3e-24
ISDev1	IS21		Devosia sp.	105	2e-19
ISPkr1	IS21		Paracoccus koreensis	103	8e-19
ISPa63	IS21		Pseudomonas aeruginosa	101	3e-18
ISRme4	IS21		Cupriavidus metallidurans	97.6	5e-17
ISPa36	IS21		Pseudomonas aeruginosa	95.6	2e-16
ISAzs17	Tn3		Azospirillum sp.	95.6	2e-16
ISVapa2	IS21		Variovorax paradoxus	89.7	1e-14
ISAav1	IS21		Acidovorax avenae	85.7	2e-13
ISThsp19	IS21		Thiomonas sp.	83.8	7e-13
ISMsi1	IS21		Methylocella silvestris	81.8	3e-12
ISVapa4	IS21		Variovorax paradoxus	79.8	1e-11
ISPpn1	IS21		Pandoraea pnomenusa	79.8	1e-11
ISPa65	IS21		Pseudomonas aeruginosa	75.8	2e-10
ISSpma1	IS3	IS407	Sphingopyxis macrogoltabida	75.8	2e-10
ISMex27	IS21		Methylobacterium extorquens	73.8	7e-10
ISCte8	IS21		Comamonas testosteroni	71.9	3e-09
ISCsp3	IS21		Comamonas sp.	71.9	3e-09
ISAisp6	IS21		Acidovorax sp.	69.9	1e-08
ISCsp4	IS21		Comamonas sp	67.9	4e-08
ISAlisp1	IS21		Alicycliphilus sp.	67.9	4e-08
ISCARN16	IS21		Metagenomic data	67.9	4e-08
ISAlde1	IS21		Alicycliphilus denitrificans	65.9	2e-07
IS1600	IS21		Ralstonia eutropha	65.9	2e-07
ISMex29	IS110	IS1111	Methylobacterium dichloromethanicum	63.9	6e-07
ISJsp3	IS21		Janthinobacterium sp	61.9	3e-06
ISMlo1	IS110	IS1111	Mesorhizobium loti	61.9	3e-06
ISMlo3	IS110	IS1111	Mesorhizobium loti	61.9	3e-06
ISPsy16	IS110	IS1111	Pseudomonas syringae	61.9	3e-06
Sphingopyxis sp. EG6
ISSpwi1	IS3	IS407	Sphingomonas wittichii	1628	0
ISSpma1	IS3	IS407	Sphingopyxis macrogoltabida	609	1e-170
ISGbe1	IS3	IS407	Granulibacter bethesdensis	392	2e-105
ISPye39	IS5	IS427	Paracoccus yeei	349	2e-92
ISAtu4	IS3	IS51	Agrobacterium tumefaciens	293	1e-75
ISSpal1	IS481		Sphingopyxis alaskensis	266	2e-67
ISSsp4	IS21		Sphingomonas sp.	258	6e-65
ISMlo4	IS3	IS51	Mesorhizobium loti	252	4e-63
ISAzs4	IS110	IS1111	Azospirillum sp.	226	2e-55
ISSfr1	IS110	IS1111	Sinorhizobium fredii	222	3e-54
ISAzs28	IS5	IS1031	Azospirillum sp.	220	1e-53
ISXau2	IS3	IS51	Xanthobacter autotrophicus	186	2e-43
ISDev1	IS21		Devosia sp.	170	1e-38
ISEc61	IS5	IS1031	Escherichia coli	168	4e-38
ISMex39	IS21		Methylobacterium extorquens	165	6e-37
ISRde1	IS3	IS51	Roseobacter denitrificans	165	6e-37
ISMch5	IS3	IS51	Methylobacterium chloromethanicum	161	1e-35
ISXau4	IS66		Xanthobacter autotrophicus	161	1e-35
ISBdi7	IS21		Bradyrhizobium diazoefficiens	149	4e-32
ISMdi27	IS21		Methylobacterium dichloromethanicum	149	4e-32
ISNisp6	IS66		Nitrobacter sp.	141	9e-30
ISAzca2	IS66		Azorhizobium caulinodans	137	1e-28
ISPye42	IS3	IS51	Paracoccus yeei	131	9e-27
ISMno13	IS66		Methylobacterium nodulans	129	4e-26
ISPa36	IS21		Pseudomonas aeruginosa	119	3e-23
ISPa63	IS21		Pseudomonas aeruginosa	117	1e-22
ISMno9	IS1182		Methylobacterium nodulans	117	1e-22
ISPmar3	IS5	IS5	Paracoccus marcusii	115	5e-22
ISPkr1	IS21		Paracoccus koreensis	115	5e-22
ISRme4	IS21		Cupriavidus metallidurans	113	2e-21
ISPmar2	IS3	IS407	Paracoccus marcusii	105	5e-19
ISPa78	IS3	IS51	Pseudomonas aeruginosa	103	2e-18
TnXo19	Tn3		Xanthomonas oryzae	101	8e-18
ISPa65	IS21		Pseudomonas aeruginosa	99.6	3e-17
ISAlisp1	IS21		Alicycliphilus sp.	99.6	3e-17
ISPpn1	IS21		Pandoraea pnomenusa	99.6	3e-17
ISMex12	IS110		Methylobacterium extorquens	99.6	3e-17
ISAav1	IS21		Acidovorax avenae	99.6	3e-17
ISPye36	IS3	IS407	Paracoccus yeei	97.6	1e-16
ISPye6	IS3	IS407	Paracoccus yeei	97.6	1e-16
ISHar2	IS3	IS3	Herminiimonas arsenicoxydans	97.6	1e-16
ISNha4	IS3	IS407	Nitrobacter hamburgensis	97.6	1e-16
ISMlo1	IS110	IS1111	Mesorhizobium loti	95.6	5e-16
ISGau3	IS3	IS51	Gemmatimonas aurantiaca	93.7	2e-15
ISVapa2	IS21		Variovorax paradoxus	89.7	3e-14
ISRhru6	IS5	IS1031	Rhodospirillum rubrum	89.7	3e-14
ISMsi1	IS21		Methylocella silvestris	89.7	3e-14
ISMex27	IS21		Methylobacterium extorquens	89.7	3e-14
ISThsp19	IS21		Thiomonas sp.	89.7	3e-14
ISPa42	Tn3		Pseudomonas aeruginosa	87.7	1e-13
ISMdi21	IS5	IS1031	Methylobacterium dichloromethanicum	85.7	5e-13
ISFpe1	IS66		Fulvimarina pelagi	85.7	5e-13
ISAcba1	IS1595	ISSod11	Actinobacteria bacterium	83.8	2e-12
ISCARN16	IS21		Metagenomic data	83.8	2e-12
ISRso12	IS3	IS407	Ralstonia solanacearum	83.8	2e-12
IS1355	IS5	IS1031	Methylobacterium dichloromethanicum	83.8	2e-12
ISVasp1	IS21		Variovorax sp.	81.8	7e-12
ISAlde2	IS21		Alicycliphilus denitrificans	81.8	7e-12
ISRsp3	IS21		Rhizobium sp.	81.8	7e-12
ISVapa4	IS21		Variovorax paradoxus	79.8	3e-11
ISCte8	IS21		Comamonas testosteroni	79.8	3e-11
ISPa64	IS21		Pseudomonas aeruginosa	79.8	3e-11
ISMpo7	IS5	IS427	Methylobacterium populi	79.8	3e-11
ISMsi3	IS3	IS407	Methylocella silvestris	79.8	3e-11
ISAisp6	IS21		Acidovorax sp.	77.8	1e-10
ISShsp1	IS110	IS1111	Sphingomonas sp.	77.8	1e-10
ISCsp4	IS21		Comamonas sp	75.8	5e-10
ISCsp3	IS21		Comamonas sp.	73.8	2e-09
ISAlde1	IS21		Alicycliphilus denitrificans	73.8	2e-09
ISMra5	IS5	IS427	Methylobacterium radiotolerans	73.8	2e-09
ISPst3	IS21		Pseudomonas stutzeri	73.8	2e-09
ISJsp3	IS21		Janthinobacterium sp	71.9	7e-09
ISGdi16	IS1182		Gluconacetobacter diazotrophicus	71.9	7e-09
ISAs16	IS110	IS1111	Aeromonas salmonicida	69.9	3e-08
ISUnCu14	IS66		uncultured bacterium	69.9	3e-08
ISPso3	IS5	IS5	Paracoccus solventivorans	69.9	3e-08
ISMno26	IS110	IS1111	Methylobacterium nodulans	69.9	3e-08
ISThsp10	IS21		Thiomonas sp.	69.9	3e-08
ISPye27	IS110	IS1111	Paracoccus yeei	67.9	1e-07
ISAisp7	IS21		Acidovorax sp.	67.9	1e-07
ISPa40	Tn3		Pseudomonas aeruginosa	67.9	1e-07
ISMpo8	IS5	IS427	Methylobacterium populi	67.9	1e-07
ISArsp6	Tn3		Arthrobacter sp.	67.9	1e-07
ISCc4	IS110	IS1111	Caulobacter crescentus	67.9	1e-07
ISRbac1	IS1182		Rhodobacteraceae bacterium	65.9	4e-07
IS1600	IS21		Ralstonia eutropha	65.9	4e-07
ISPye45	IS66		Paracoccus yeei	63.9	2e-06
ISMex15	IS5	IS427	Methylobacterium extorquens	63.9	2e-06
ISPa29	IS110	IS1111	Pseudomonas aeruginosa	63.9	2e-06
ISApr6	IS66		Alpha proteobacterium	63.9	2e-06
ISStma15	IS3	IS51	Stenotrophomonas maltophilia	61.9	7e-06
ISMdi16	IS3	IS407	Methylobacterium dichloromethanicum	61.9	7e-06
ISAzo41	IS5	IS5	Azoarcus sp.	61.9	7e-06
ISSusp1	IS3	IS51	Sulfitobacter sp.	61.9	7e-06
ISXau3	IS3	IS51	Xanthobacter autotrophicus	61.9	7e-06
ISPps1	IS91		Pseudomonas huttiensis	2876	0
IS6100	IS6		Mycobacterium fortuitum	507	3e-142
IS1071	Tn3		Alcaligenes sp.	450	6e-125
ISPmar3	IS5	IS5	Paracoccus marcusii	115	4e-24
ISPso3	IS5	IS5	Paracoccus solventivorans	69.9	2e-10
ISAcr2	IS6		Acidiphilium cryptum	67.9	8e-10
ISAzo41	IS5	IS5	Azoarcus sp.	61.9	5e-08
ISMex35	IS5	IS5	Methylobacterium extorquens	60	2e-07
ISSsp126	IS5	IS5	Sphingomonas sp.	56	3e-06
Sphingopyxis sp. FD7
ISSpma2	IS256		Sphingopyxis macrogoltabida	2757	0
ISSpma3	IS3	IS407	Sphingopyxis macrogoltabida	2508	0
ISSsp2	IS3	IS150	Sphingomonas sp.	1703	0
ISPko4	IS3	IS150	Paracoccus kondratievae	1584	0
ISSpwi1	IS3	IS407	Sphingomonas wittichii	1564	0
ISNha9	IS256		Nitrobacter hamburgensis	856	0
ISSpal1	IS481		Sphingopyxis alaskensis	622	9e-175
ISSpma1	IS3	IS407	Sphingopyxis macrogoltabida	611	3e-171
ISEli1	IS3	IS407	Erythrobacter litoralis	567	4e-158
ISEc61	IS5	IS1031	Escherichia coli	529	1e-146
ISSpwi2	IS256		Sphingomonas wittichii	448	3e-122
ISPye39	IS5	IS427	Paracoccus yeei	349	2e-92
ISMch1	IS3	IS150	Methylobacterium chloromethanicum	347	8e-92
ISMex14	IS256		Methylobacterium extorquens	313	1e-81
ISApr14	IS256		alpha proteobacterium	311	4e-81
ISGbe1	IS3	IS407	Granulibacter bethesdensis	299	2e-77
ISAzs28	IS5	IS1031	Azospirillum sp.	287	6e-74
ISMex37	IS3	IS150	Methylobacterium extorquens	260	1e-65
ISMch3	IS3	IS150	Methylobacterium chloromethanicum	250	1e-62
ISCc3	IS3	IS150	Caulobacter crescentus	244	8e-61
ISAzs19	IS256		Azospirillum sp.	240	1e-59
ISAli7	IS256		Azospirillum lipoferum	222	3e-54
ISSsp4	IS21		Sphingomonas sp.	208	5e-50
ISMno31	IS3	IS150	Methylobacterium nodulans	200	1e-47
ISSsp126	IS5	IS5	Sphingomonas sp.	192	3e-45
ISAzba8	IS256		Azospirillum brasilense	182	3e-42
ISNwi5	IS481		Nitrobacter winogradskyi	180	1e-41
ISRle12	IS256		Rhizobium leguminosarum	174	6e-40
ISMex16	IS3	IS150	Methylobacterium extorquens	165	6e-37
IS1356	IS256		Burkholderia cepacia	165	6e-37
ISMex39	IS21		Methylobacterium extorquens	159	4e-35
ISGdi9	IS481		Gluconacetobacter diazotrophicus	155	6e-34
ISPmar2	IS3	IS407	Paracoccus marcusii	137	1e-28
ISMdi5	IS3	IS3	Methylobacterium dichloromethanicum	137	1e-28
ISNha4	IS3	IS407	Nitrobacter hamburgensis	137	1e-28
ISBdi7	IS21		Bradyrhizobium diazoefficiens	135	6e-28
ISNe2	IS481		Nitrosomonas europaea	127	1e-25
ISDev1	IS21		Devosia sp.	121	8e-24
TnXo19	Tn3		Xanthomonas oryzae	119	3e-23
ISMdi27	IS21		Methylobacterium dichloromethanicum	119	3e-23
IS511	IS3	IS407	Caulobacter crescentus	117	1e-22
ISMtsp8	IS21		Methylobacterium sp.	115	5e-22
ISNGR8	IS256		Rhizobium sp	113	2e-21
ISPye10	IS5	IS1031	Paracoccus yeei	109	3e-20
ISRel12	IS481		Rhizobium sp.	109	3e-20
ISApr6	IS66		Alpha proteobacterium	109	3e-20
ISAzs33	IS3	IS150	Azospirillum sp.	107	1e-19
ISRel11	IS5	IS427	Rhizobium etli	105	5e-19
ISSme1	IS3	IS407	Sinorhizobium medicae	105	5e-19
ISRm6	IS3	IS407	Rhizobium meliloti	105	5e-19
ISPye3	IS3	IS150	Paracoccus yeei	103	2e-18
ISPkr1	IS21		Paracoccus koreensis	103	2e-18
ISMex13	IS21		Methylobacterium extorquens	103	2e-18
ISPa63	IS21		Pseudomonas aeruginosa	101	8e-18
ISMex35	IS5	IS5	Methylobacterium extorquens	99.6	3e-17
ISPye36	IS3	IS407	Paracoccus yeei	97.6	1e-16
ISMdi8	IS481		Methylobacterium dichloromethanicum	97.6	1e-16
ISPa36	IS21		Pseudomonas aeruginosa	95.6	5e-16
ISAzs30	IS21		Azospirillum sp.	95.6	5e-16
IS1031A	IS5	IS1031	Acetobacter xylinum	95.6	5e-16
ISPebe1	IS256		Pelagibaca bermudensis	93.7	2e-15
ISMamg2	IS3	IS407	Magnetospirillum magneticum	93.7	2e-15
ISAli5	IS3	IS150	Azospirillum lipoferum	93.7	2e-15
ISCc1	IS5	IS427	Caulobacter crescentus	93.7	2e-15
ISR1	IS3	IS407	Rhizobium lupini	91.7	7e-15
ISVapa2	IS21		Variovorax paradoxus	89.7	3e-14
ISMex7	IS3	IS150	Methylobacterium extorquens	87.7	1e-13
ISNisp6	IS66		Nitrobacter sp.	87.7	1e-13
ISXau1	IS3	IS407	Xanthobacter autotrophicus	87.7	1e-13
ISRtr3	IS5	IS1031	Rhizobium tropici	87.7	1e-13
ISPye6	IS3	IS407	Paracoccus yeei	85.7	5e-13
ISGxy1	IS3	IS150	Gluconacetobacter xylinus	85.7	5e-13
ISAzs17	Tn3		Azospirillum sp.	85.7	5e-13
ISRel3	IS21		Rhizobium etli	85.7	5e-13
ISRm3G	IS256		Rhizobium meliloti	85.7	5e-13
ISRm3	IS256		Rhizobium meliloti	85.7	5e-13
ISAav1	IS21		Acidovorax avenae	85.7	5e-13
ISMtsp16	IS481		Methylobacterium sp.	83.8	2e-12
ISOba1	IS3	IS407	Oceanicola batsensis	83.8	2e-12
ISRhru4	IS256		Rhodospirillum rubrum	81.8	7e-12
ISMsi1	IS21		Methylocella silvestris	81.8	7e-12
ISThsp19	IS21		Thiomonas sp.	81.8	7e-12
ISGdi1	IS5	IS1031	Gluconacetobacter diazotrophicus	81.8	7e-12
ISPye57	IS3	IS407	Paracoccus yeei	79.8	3e-11
ISPye34	IS3	IS407	Paracoccus yeei	79.8	3e-11
ISVapa4	IS21		Variovorax paradoxus	79.8	3e-11
ISPpn1	IS21		Pandoraea pnomenusa	79.8	3e-11
ISRel20	IS5	IS1031	Rhizobium etli	77.8	1e-10
ISMtsp13	IS256		Methylobacterium sp.	77.8	1e-10
ISRpa2	IS3	IS407	Rhodopseudomonas palustris	77.8	1e-10
ISPa65	IS21		Pseudomonas aeruginosa	75.8	4e-10
ISAzca2	IS66		Azorhizobium caulinodans	75.8	4e-10
ISAcba1	IS1595	ISSod11	Actinobacteria bacterium	73.8	2e-09
ISUnCu14	IS66		uncultured bacterium	73.8	2e-09
ISMno13	IS66		Methylobacterium nodulans	73.8	2e-09
ISMex27	IS21		Methylobacterium extorquens	73.8	2e-09
ISAzo39	IS5	IS5	Azoarcus sp.	73.8	2e-09
ISFpe1	IS66		Fulvimarina pelagi	73.8	2e-09
ISCte8	IS21		Comamonas testosteroni	71.9	7e-09
ISMex1	IS3	IS407	Methylobacterium extorquens	71.9	7e-09
ISMamg1	IS3	IS407	Magnetospirillum magneticum	71.9	7e-09
IS1311	IS256		Mycobacterium avium	71.9	7e-09
ISAli6	IS256		Azospirillum lipoferum	69.9	3e-08
ISBcen18	IS256		Burkholderia cenocepacia	69.9	3e-08
ISRtr1	IS256		Rhizobium tropici	69.9	3e-08
ISPye45	IS66		Paracoccus yeei	67.9	1e-07
ISCsp4	IS21		Comamonas sp	67.9	1e-07
ISAlisp1	IS21		Alicycliphilus sp.	67.9	1e-07
ISMdi4	IS481		Methylobacterium dichloromethanicum	67.9	1e-07
ISMex5	IS3	IS407	Methylobacterium extorquens	67.9	1e-07
ISCARN16	IS21		Metagenomic data	67.9	1e-07
ISXau4	IS66		Xanthobacter autotrophicus	67.9	1e-07
ISGdi3	IS5	IS1031	Gluconacetobacter diazotrophicus	67.9	1e-07
ISVasp1	IS21		Variovorax sp.	65.9	4e-07
ISAisp7	IS21		Acidovorax sp.	65.9	4e-07
ISAlde1	IS21		Alicycliphilus denitrificans	65.9	4e-07
ISPso1	IS256		Paracoccus solventivorans	65.9	4e-07
ISRosp5	IS3	IS407	Roseobacter sp.	65.9	4e-07
ISBcen28	IS21		Burkholderia cenocepacia	65.9	4e-07
IS1600	IS21		Ralstonia eutropha	65.9	4e-07
ISPa73	IS256		Pseudomonas aeruginosa	63.9	2e-06
ISGdi11	IS3	IS407	Gluconacetobacter diazotrophicus	63.9	2e-06
ISGdi8	IS256		Gluconacetobacter diazotrophicus	63.9	2e-06
ISPst3	IS21		Pseudomonas stutzeri	63.9	2e-06
ISAtu5	IS3	IS407	Agrobacterium tumefaciens	63.9	2e-06
ISRtr4	IS5	IS1031	Rhizobium tropici	63.9	2e-06
ISJsp3	IS21		Janthinobacterium sp	61.9	7e-06
ISAisp6	IS21		Acidovorax sp.	61.9	7e-06
ISTsu1	IS256		Thermaerobacter subterraneus	61.9	7e-06
ISMtsp20	IS5	IS1031	Methylobacterium sp.	61.9	7e-06
ISMdi11	IS481		Methylobacterium dichloromethanicum	61.9	7e-06
ISPa1328	IS256		Pseudomonas aeruginosa	61.9	7e-06
ISSpwi1	IS3	IS407	Sphingomonas wittichii	1620	0
ISPko4	IS3	IS150	Paracoccus kondratievae	1364	0
ISSsp2	IS3	IS150	Sphingomonas sp.	1346	0
ISDev1	IS21		Devosia sp.	718	0
ISRsp3	IS21		Rhizobium sp.	638	0
ISSpma1	IS3	IS407	Sphingopyxis macrogoltabida	609	9e-172
IS6100	IS6		Mycobacterium fortuitum	507	2e-141
ISGdi14	IS3	IS51	Gluconacetobacter diazotrophicus	404	3e-110
ISGbe1	IS3	IS407	Granulibacter bethesdensis	404	3e-110
ISMex27	IS21		Methylobacterium extorquens	375	2e-101
ISCc3	IS3	IS150	Caulobacter crescentus	200	7e-49
ISMch3	IS3	IS150	Methylobacterium chloromethanicum	174	4e-41
ISAlde2	IS21		Alicycliphilus denitrificans	168	3e-39
ISPa64	IS21		Pseudomonas aeruginosa	163	2e-37
ISMex37	IS3	IS150	Methylobacterium extorquens	157	1e-35
ISThsp10	IS21		Thiomonas sp.	153	2e-34
ISCsp3	IS21		Comamonas sp.	145	4e-32
ISPa36	IS21		Pseudomonas aeruginosa	133	1e-28
ISPpn1	IS21		Pandoraea pnomenusa	131	6e-28
IS1600	IS21		Ralstonia eutropha	131	6e-28
ISMno31	IS3	IS150	Methylobacterium nodulans	127	9e-27
ISAlde1	IS21		Alicycliphilus denitrificans	123	1e-25
ISPst3	IS21		Pseudomonas stutzeri	121	5e-25
ISCte8	IS21		Comamonas testosteroni	119	2e-24
ISAisp7	IS21		Acidovorax sp.	115	3e-23
ISMtsp8	IS21		Methylobacterium sp.	115	3e-23
ISAlsp1	IS21		Alcaligenes sp.	113	1e-22
ISVasp1	IS21		Variovorax sp.	107	8e-21
ISPmar2	IS3	IS407	Paracoccus marcusii	105	3e-20
ISGdi17	IS21		Gluconacetobacter diazotrophicus	105	3e-20
ISMex13	IS21		Methylobacterium extorquens	103	1e-19
ISVapa3	IS21		Variovorax paradoxus	101	5e-19
ISPa63	IS21		Pseudomonas aeruginosa	99.6	2e-18
ISPye36	IS3	IS407	Paracoccus yeei	97.6	8e-18
ISPye6	IS3	IS407	Paracoccus yeei	97.6	8e-18
ISMex16	IS3	IS150	Methylobacterium extorquens	97.6	8e-18
ISNha4	IS3	IS407	Nitrobacter hamburgensis	97.6	8e-18
ISAzs30	IS21		Azospirillum sp.	95.6	3e-17
ISHne1	IS3	IS51	Hyphomonas neptunium	95.6	3e-17
ISRme4	IS21		Cupriavidus metallidurans	93.7	1e-16
ISRel3	IS21		Rhizobium etli	85.7	3e-14
ISMex5	IS3	IS407	Methylobacterium extorquens	83.8	1e-13
ISPa65	IS21		Pseudomonas aeruginosa	81.8	5e-13
ISThsp19	IS21		Thiomonas sp.	81.8	5e-13
ISAtu1	IS110	IS1111	Agrobacterium tumefaciens	79.8	2e-12
ISAzsp1	IS3	IS51	Azotobacter sp.	77.8	7e-12
ISThsp2	IS21		Thiomonas sp.	75.8	3e-11
ISAav1	IS21		Acidovorax avenae	75.8	3e-11
ISJsp1	IS3	IS51	Janthinobacterium sp.	73.8	1e-10
ISLisp1	IS21		Limnohabitans sp.	71.9	5e-10
ISMtsp7	IS110	IS1111	Methylobacterium sp.	71.9	5e-10
ISRtr2	IS3	IS51	Rhizobium tropici	69.9	2e-09
Tn5393	Tn3		Erwinia amylovora	65.9	3e-08
ISRosp5	IS3	IS407	Roseobacter sp.	65.9	3e-08
ISThsp9	Tn3		Thiomonas sp.	65.9	3e-08
ISAli4	IS3	IS51	Azospirillum lipoferum	65.9	3e-08
ISBcen28	IS21		Burkholderia cenocepacia	65.9	3e-08
ISCsp4	IS21		Comamonas sp	61.9	4e-07
ISAlisp1	IS21		Alicycliphilus sp.	61.9	4e-07
ISMdi16	IS3	IS407	Methylobacterium dichloromethanicum	61.9	4e-07
ISMex22	Tn3		Methylobacterium extorquens	61.9	4e-07
ISPsy20	IS21		Pseudomonas syringae	61.9	4e-07
IS1326	IS21		Pseudomonas aeruginosa	61.9	4e-07
ISPman1	IS21		Pseudomonas mandelii	60	2e-06
ISPpu27	IS21		Pseudomonas putida	60	2e-06
ISPkr1	IS21		Paracoccus koreensis	60	2e-06
ISMex39	IS21		Methylobacterium extorquens	60	2e-06
ISCARN16	IS21		Metagenomic data	60	2e-06
ISPpu33	IS3	IS51	Pseudomonas putida	58	7e-06
TnAs1	Tn3		Aeromonas salmonicida	58	7e-06
TnAs2	Tn3		Aeromonas salmonicida	58	7e-06
ISCARN86	IS3	IS407	Metagenomic data	58	7e-06
ISAfe7	IS3	IS51	Acidithiobacillus ferrooxidans	58	7e-06
ISAau4	Tn3		Arthrobacter aurescens	58	7e-06
ISDsp2	IS3	IS407	Dehalococcoides sp.	58	7e-06
ISMmg2	IS110	IS1111	Magnetospirillum magnetotacticum	58	7e-06
Sphingopyxis sp. MC1
ISSsp2	IS3	IS150	Sphingomonas sp.	1663	0
ISSpwi1	IS3	IS407	Sphingomonas wittichii	1604	0
ISPko4	IS3	IS150	Paracoccus kondratievae	1298	0
ISSpma1	IS3	IS407	Sphingopyxis macrogoltabida	593	1e-166
ISGbe1	IS3	IS407	Granulibacter bethesdensis	385	6e-104
ISCc3	IS3	IS150	Caulobacter crescentus	281	7e-73
ISMex37	IS3	IS150	Methylobacterium extorquens	174	1e-40
ISMno31	IS3	IS150	Methylobacterium nodulans	149	7e-33
ISMch3	IS3	IS150	Methylobacterium chloromethanicum	141	2e-30
ISMex16	IS3	IS150	Methylobacterium extorquens	131	2e-27
ISSsp4	IS21		Sphingomonas sp.	121	1e-24
ISMex39	IS21		Methylobacterium extorquens	115	9e-23
ISMdi27	IS21		Methylobacterium dichloromethanicum	111	1e-21
ISPye36	IS3	IS407	Paracoccus yeei	97.6	2e-17
ISPye6	IS3	IS407	Paracoccus yeei	97.6	2e-17
ISPmar2	IS3	IS407	Paracoccus marcusii	97.6	2e-17
ISMex27	IS21		Methylobacterium extorquens	97.6	2e-17
ISRme4	IS21		Cupriavidus metallidurans	91.7	1e-15
ISPkr1	IS21		Paracoccus koreensis	89.7	5e-15
ISNha4	IS3	IS407	Nitrobacter hamburgensis	89.7	5e-15
ISDev1	IS21		Devosia sp.	83.8	3e-13
ISPa36	IS21		Pseudomonas aeruginosa	81.8	1e-12
ISVasp1	IS21		Variovorax sp.	73.8	3e-10
ISCte8	IS21		Comamonas testosteroni	71.9	1e-09
ISPpn1	IS21		Pandoraea pnomenusa	71.9	1e-09
ISJsp3	IS21		Janthinobacterium sp	71.9	1e-09
ISPa63	IS21		Pseudomonas aeruginosa	71.9	1e-09
ISAlde2	IS21		Alicycliphilus denitrificans	69.9	5e-09
ISMsi1	IS21		Methylocella silvestris	69.9	5e-09
ISMex5	IS3	IS407	Methylobacterium extorquens	69.9	5e-09
ISVapa2	IS21		Variovorax paradoxus	67.9	2e-08
ISMdi16	IS3	IS407	Methylobacterium dichloromethanicum	61.9	1e-06
ISCsp4	IS21		Comamonas sp	60	5e-06
ISSpwi1	IS3	IS407	Sphingomonas wittichii	85.7	7e-14
ISMtsp17	IS110	IS1111	Methylobacterium sp.	101	4e-19
ISPye26	IS110	IS1111	Paracoccus yeei	73.8	9e-11
ISPye47	IS110	IS1111	Paracoccus yeei	73.8	9e-11
ISPko7	IS110	IS1111	Paracoccus kondratievae	58	5e-06
ISMpo10	Tn3		Methylobacterium populi	69.9	5e-10
ISAzo26	IS91		Azoarcus sp.	58	2e-06
ISPko4	IS3	IS150	Paracoccus kondratievae	176	1e-41
ISSsp2	IS3	IS150	Sphingomonas sp.	131	7e-28
ISPa42	Tn3		Pseudomonas aeruginosa	131	7e-28
ISMlo3	IS110	IS1111	Mesorhizobium loti	107	1e-20
TnXo19	Tn3		Xanthomonas oryzae	101	6e-19
ISMmg2	IS110	IS1111	Magnetospirillum magnetotacticum	97.6	1e-17
ISPye46	IS110	IS1111	Paracoccus yeei	93.7	2e-16
ISMex29	IS110	IS1111	Methylobacterium dichloromethanicum	85.7	4e-14
ISAcba1	IS1595	ISSod11	Actinobacteria bacterium	83.8	1e-13
ISArsp6	Tn3		Arthrobacter sp.	67.9	9e-09
ISCc4	IS110	IS1111	Caulobacter crescentus	63.9	1e-07
ISAzs4	IS110	IS1111	Azospirillum sp.	60	2e-06
ISSpma1	IS3	IS407	Sphingopyxis macrogoltabida	196	3e-48
ISMex39	IS21		Methylobacterium extorquens	159	6e-37
ISSsp4	IS21		Sphingomonas sp.	137	2e-30
ISBdi7	IS21		Bradyrhizobium diazoefficiens	135	9e-30
ISDev1	IS21		Devosia sp.	121	1e-25
ISMdi27	IS21		Methylobacterium dichloromethanicum	119	6e-25
ISPkr1	IS21		Paracoccus koreensis	103	3e-20
ISPa63	IS21		Pseudomonas aeruginosa	101	1e-19
ISPa36	IS21		Pseudomonas aeruginosa	95.6	8e-18
ISVapa2	IS21		Variovorax paradoxus	89.7	5e-16
ISRme4	IS21		Cupriavidus metallidurans	89.7	5e-16
ISAav1	IS21		Acidovorax avenae	85.7	8e-15
ISMsi1	IS21		Methylocella silvestris	81.8	1e-13
ISThsp19	IS21		Thiomonas sp.	81.8	1e-13
ISGbe1	IS3	IS407	Granulibacter bethesdensis	81.8	1e-13
ISVapa4	IS21		Variovorax paradoxus	79.8	5e-13
ISPpn1	IS21		Pandoraea pnomenusa	79.8	5e-13
ISPa65	IS21		Pseudomonas aeruginosa	75.8	7e-12
ISMex27	IS21		Methylobacterium extorquens	73.8	3e-11
ISCte8	IS21		Comamonas testosteroni	71.9	1e-10
ISSpwi1	IS3	IS407	Sphingomonas wittichii	71.9	1e-10
ISCsp4	IS21		Comamonas sp	67.9	2e-09
ISAlisp1	IS21		Alicycliphilus sp.	67.9	2e-09
ISCARN16	IS21		Metagenomic data	67.9	2e-09
ISVasp1	IS21		Variovorax sp.	65.9	7e-09
ISAisp7	IS21		Acidovorax sp.	65.9	7e-09
ISAlde1	IS21		Alicycliphilus denitrificans	65.9	7e-09
IS1600	IS21		Ralstonia eutropha	65.9	7e-09
ISPst3	IS21		Pseudomonas stutzeri	63.9	3e-08
ISAlde2	IS21		Alicycliphilus denitrificans	61.9	1e-07
ISJsp3	IS21		Janthinobacterium sp	61.9	1e-07
ISAisp6	IS21		Acidovorax sp.	61.9	1e-07
ISPa64	IS21		Pseudomonas aeruginosa	60	4e-07
ISCsp3	IS21		Comamonas sp.	58	2e-06
ISMamg2	IS3	IS407	Magnetospirillum magneticum	107	4e-23
ISMex1	IS3	IS407	Methylobacterium extorquens	107	4e-23
[truncated: 826 more rows]
